# Supplementary material
Source: ML conference proceedings conference paper supplement (https://openreview.net/forum?id=x4ZmQaumRg)
Supplement: supplementary_material [file attachment]

# ACTIVE LEARNING FOR NEURAL PDE SOLVERS

**Anonymous authors**

Paper under double-blind review

## ABSTRACT

Solving partial differential equations (PDEs) is a fundamental problem in engineering and science. While neural PDE solvers can be more efficient than established numerical solvers, they often require large amounts of training data that is costly to obtain. Active Learning (AL) could help surrogate models reach the same accuracy with smaller training sets by querying classical solvers with more informative initial conditions and PDE parameters. While AL is more common in other domains, it has yet to be studied extensively for neural PDE solvers. To bridge this gap, we introduce AL4PDE, a modular and extensible active learning benchmark. It provides multiple parametric PDEs and state-of-the-art surrogate models for the solver-in-the-loop setting, enabling the evaluation of existing and the development of new AL methods for neural PDE solving. We use the benchmark to evaluate batch active learning algorithms such as uncertainty- and feature-based methods. We show that AL reduces the average error by up to 71% compared to random sampling and significantly reduces worst-case errors. Moreover, AL generates similar datasets across repeated runs, with consistent distributions over the PDE parameters and initial conditions. The acquired datasets are reusable, providing benefits for surrogate models not involved in the data generation.

## 1 INTRODUCTION

Partial differential equations describe numerous physical phenomena such as fluid dynamics, heat flow, and cell growth. Because of the difficulty of obtaining exact solutions for PDEs, it is common to utilize numerical schemes to obtain approximate solutions. However, numerical solvers require a high temporal and spatial resolution to obtain sufficiently accurate numerical solutions, leading to high computational costs. This issue is further exacerbated in settings like parameter studies, inverse problems, or design optimization, where many iterations of simulations must be conducted. Thus, it can be beneficial to replace the numerical simulator with a surrogate model by training a neural network to predict the simulator outputs (Takamoto et al., 2022; Lippe et al., 2023; Brandstetter et al., 2021; Gupta & Brandstetter, 2023; Li et al., 2020b). In addition to being more efficient, neural surrogate models have other advantages, such as being end-to-end differentiable.

One of the main challenges of neural PDE surrogates is that their training data is often obtained from the same expensive simulators they are intended to ultimately replace. Hence, training a surrogate provides a computational advantage only if the generation of the training data set requires fewer simulations than will be saved during inference. Moreover, it is non-trivial to obtain training data for a diverse set of initial conditions and PDE parameters required to train a surrogate model with sufficient generalizability. For instance, contrary to training foundation models for text and images, foundation models for solving PDEs require targeted and expensive data generation to generalize well.

Active learning is a possible solution to these challenges as it might help to iteratively select a smaller number of the most informative and diverse training trajectories, thereby reducing the total number of simulations required to reach the same level of accuracy. Furthermore, AL may also improve the reliability of the surrogate models by covering challenging dynamical regimes with enough training data, which may otherwise be hard to find through hand-tuned input distributions. However, developing neural PDE solvers is a challenging problem for AL due to the complex regression tasks characterized by high-dimensional input and output spaces and time series data. While AL has been used extensively for other scientific ML domains such as material science (Lookman et al., 2019; Wang et al., 2022; Zaverkin et al., 2022; 2024), it has only been recently applied to PDEs

054  
055  
056  
057  
058  
059  
060  
061  
062  
063  
064  
065  
066  
067  
068  
069  
070  
071  
072  
073  
074  
075  
076  
077  
078  
079  
080  
081  
082  
083  
084  
085  
086  
087  
088  
089  
090  
091  
092  
093  
094  
095  
096  
097  
098  
099  
100  
101  
102  
103  
104  
105  
106  
107

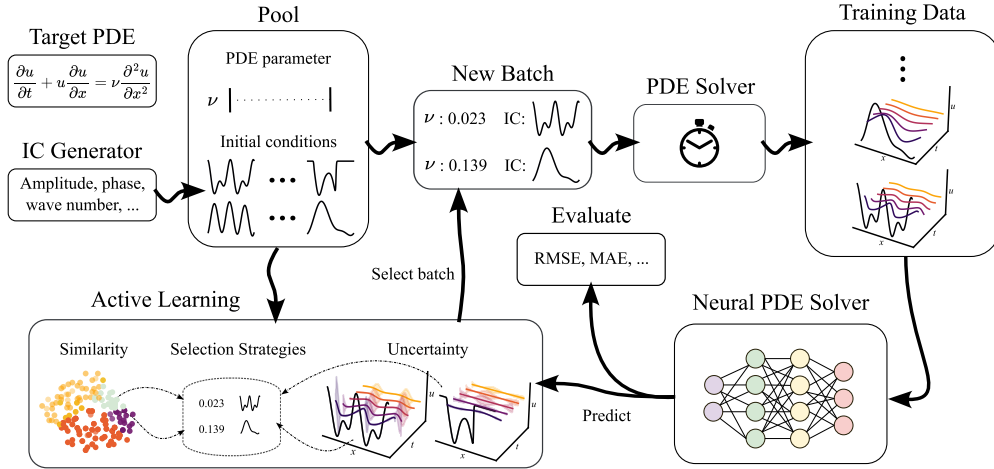

Figure 1: An extensible benchmark framework for pool-based active learning for neural PDE solvers.

in the context of physics-informed neural networks (PINNs; Wu et al. 2023a; Sahli Costabal et al. 2020; Aikawa et al. 2023), specific PDE domains (Pestourie et al., 2021; 2023), or direct prediction models (Li et al., 2023; 2020b). Hence, AL is still unexplored for a broader class of neural PDE solvers, which currently rely on extensive, brute-force numerical simulations to generate a sufficient amount of training data.

**Contributions.** This paper presents AL4PDE, the first AL framework for neural PDE solvers. The benchmark supports the study of existing AL algorithms in scientific ML applications and facilitates the development of novel PDE-specific AL methods. In addition to various AL algorithms, the benchmark provides differentiable numerical simulators for multiple PDEs, such as compressible Navier-Stokes, and neural surrogate models, such as the U-Net (Ronneberger et al., 2015; Gupta & Brandstetter, 2023). The benchmark is extensible, allowing new algorithms, models, and tasks to be added. Using the benchmark, we conducted several experiments exploring the behavior of AL algorithms for PDE solving. These experiments show that AL can increase data efficiency and especially reduce worst-case errors. Among the methods, the largest cluster maximum distance (LCMD) and stochastic batch active learning (SBAL) are consistently the two best-performing algorithms. We demonstrate that using AL can result in more accurate surrogate models trained in less time. Additionally, the generated data distribution is consistent between random repetitions, initial datasets, and models, showing that AL can reliably generate reusable datasets for neural PDE solvers that were not used to gather the data. The code is available at [https://anonymous.4open.science/r/al4pde\\_benchmark](https://anonymous.4open.science/r/al4pde_benchmark).

## 2 BACKGROUND

We seek the solution  $\mathbf{u} : [0, T] \times \mathcal{X} \rightarrow \mathbb{R}^{N_c}$  of a PDE with a  $D$ -dimensional spatial domain  $\mathcal{X}$ ,  $\mathbf{x} = [x_1, x_2, \dots, x_D]^\top \in \mathcal{X}$ , temporal domain  $t \in [0, T]$ , and  $N_c$  field variables or channels  $c$  (Brandstetter et al., 2021):

$$\partial_t \mathbf{u} = F(\boldsymbol{\lambda}, t, \mathbf{x}, \mathbf{u}, \partial_{\mathbf{x}} \mathbf{u}, \partial_{\mathbf{x}\mathbf{x}} \mathbf{u}, \dots), \quad (t, \mathbf{x}) \in [0, T] \times \mathcal{X} \quad (1)$$

$$\mathbf{u}(0, \mathbf{x}) = \mathbf{u}^0(\mathbf{x}), \quad \mathbf{x} \in \mathcal{X}; \quad \mathcal{B}[\mathbf{u}](t, \mathbf{x}) = 0, \quad (t, \mathbf{x}) \in [0, T] \times \partial\mathcal{X} \quad (2)$$

Here, the boundary condition  $\mathcal{B}$  (Eq. 2) determines the behavior of the solution at the boundaries  $\partial\mathcal{X}$  of the spatial domain  $\mathcal{X}$ , and the initial condition (IC)  $\mathbf{u}^0$  defines the initial state of the system (Eq. 2). The vector  $\boldsymbol{\lambda} = (\lambda_1, \dots, \lambda_l)^\top \in \mathbb{R}^l$  with  $\lambda_i \in [a_i, b_i]$  denotes the PDE parameters which influence the dynamics of the physical system governed by the PDE such as the diffusion coefficient in Burgers' equation. In the following, we only consider a single boundary condition (periodic) for simplicity, and thus a single initial value problem can be identified by the tuple  $\boldsymbol{\psi} = (\mathbf{u}^0, \boldsymbol{\lambda})$ . The inputs to the initial value problem are drawn from the test input distribution  $p_T$ ,  $\boldsymbol{\psi} \sim p_T(\boldsymbol{\psi}) = p_T(\mathbf{u}^0)p_T(\boldsymbol{\lambda})$ . The distributions are typically only given implicitly, i.e., we are given an IC generator  $p_T(\mathbf{u}^0)$  and a

PDE parameter generator  $p_T(\boldsymbol{\lambda})$ , from which we can draw samples. For instance, the ICs may be drawn from a superposition of sinusoidal functions with random amplitudes and phases (Takamoto et al., 2022), while the PDE parameters ( $\lambda_i$ ) are typically drawn uniformly from their interval  $[a_i, b_i]$ .

The ground truth data is generated using a numerical solver, which can be defined as a forward operator  $\mathcal{G} : \mathcal{U} \times \mathbb{R}^l \rightarrow \mathcal{U}$ , mapping the solution at the current timestep to the one at the next timestep (Li et al., 2020b; Takamoto et al., 2022),  $\mathbf{u}(t + \Delta t, \cdot) = \mathcal{G}(\mathbf{u}(t, \cdot), \boldsymbol{\lambda})$  with timestep size  $\Delta t$ . Here,  $\mathcal{U}$  is a suitable space of functions  $\mathbf{u}(t, \cdot)$ . The solution  $\mathbf{u}$  is uniformly discretized across the spatial dimensions, yielding  $N_x$  spatial points in total and the temporal dimension into  $N_t$  timesteps. The forward operator is applied autoregressively, i.e., feeding the output state back into  $\mathcal{G}$  (also called rollout), to obtain a full trajectory  $\mathbf{u} = (\mathbf{u}^0, \mathbf{u}^1, \dots, \mathbf{u}^{N_t})$ . We aim to replace the numerical solver with a neural PDE solver. While there are also other paradigms such as PINNs (Raissi et al., 2019), we restrict ourselves to autoregressive solvers  $\mathcal{G}_\theta$  with  $\hat{\mathbf{u}}(t + \Delta t, \cdot) = \mathcal{G}_\theta(\hat{\mathbf{u}}(t, \cdot), \boldsymbol{\lambda})$  (Lippe et al., 2023). The training set for the said  $\mathcal{G}_\theta(\mathbf{u}(t, \cdot), \boldsymbol{\lambda})$  consists of aligned pairs of  $\boldsymbol{\psi}$  and the corresponding solutions obtained from the numerical solver, i.e.,  $\mathcal{S}_{\text{train}} = \{(\boldsymbol{\psi}_1, \mathbf{u}_1), \dots, (\boldsymbol{\psi}_{N_{\text{train}}}, \mathbf{u}_{N_{\text{train}}})\}$ . The neural network parameters  $\theta$  are minimized using the root mean squared error (RMSE) on the training samples,

$$\mathcal{L}_{\text{RMSE}}(\mathbf{u}, \hat{\mathbf{u}}) = \sqrt{\frac{1}{N_t N_x N_c} \sum_{i=1}^{N_t} \sum_{j=1}^{N_x} \|\mathbf{u}(t_i, \mathbf{x}_j) - \hat{\mathbf{u}}(t_i, \mathbf{x}_j)\|_2^2} \quad (3)$$

where  $\hat{\mathbf{u}}$  denotes the estimated solutions of the neural surrogate models.

### 3 RELATED WORK

Neural surrogate models for solving parametric PDEs is a popular area of research (Takamoto et al., 2023; Kapoor et al., 2023; Lippe et al., 2023; Hagnberger et al., 2024; Cho et al., 2024). Most existing works, however, often focus on single or uniformly sampled parameter values for the PDE coefficients and improving the neural architectures to boost the accuracy. In the context of neural PDE solvers, AL has primarily been applied to select the collocation points of PINNs. A typical approach is to sample the collocation points based on the residual error directly (Arthurs & King, 2021; Gao & Wang, 2023; Mao & Meng, 2023; Wu et al., 2023a). While this strategy can be effective, it differs from standard AL since it uses the “label”, i.e., the residual loss, when selecting data points. Aikawa et al. (2023) use a Bayesian PINN to select points based on uncertainty, whereas Sahli Costabal et al. (2020) employ a PINN ensemble for AL of cardiac activation mapping.

Pestourie et al. (2020) use AL to approximate Maxwell equations using ensemble-based uncertainty quantification for metamaterial design. Uncertainty-based AL was also employed for diffusion, reaction-diffusion, and electromagnetic scattering (Pestourie et al., 2023). In multi-fidelity AL, the optimal spatial resolution of the simulation is chosen (Li et al., 2020a; 2021; Wu et al., 2023b). For instance, Li et al. (2023) use an ensemble of FNOs in the single prediction setting. Wu et al. (2023c) apply AL to stochastic simulations using a spatio-temporal neural process. Bajracharya et al. (2024) investigate AL to predict the stationary solution of a diffusion problem. They consider AL using two different uncertainty estimation techniques and selecting based on the diversity in the input space. Pickering et al. (2022) use AL to find extreme events using ensembles of DeepONets (Lu et al., 2019). Next to using AL, it is also possible to reduce the data generation time using Krylov Subspace Recycling (Wang et al., 2023) or by applying data augmentation techniques such as Lie-point symmetries (Brandstetter et al., 2022). Such symmetries could also be combined with AL using LADA (Kim et al., 2021).

In recent years, several benchmarks for neural PDE solvers have been published (Takamoto et al., 2022; Gupta & Brandstetter, 2023; Hao et al., 2023; Luo et al., 2023; Liu et al., 2024). For instance, PDEBench (Takamoto et al., 2022) and PDEArena (Gupta & Brandstetter, 2023) provide efficient implementations of numerical solvers for multiple hydrodynamic PDEs such as Advection, Navier-Stokes, as well as recent implementations of neural PDE solvers (e.g., DilResNet, U-Net, FNO) for standard and conditioned PDE solving. Similarly, CODBench (Burark et al., 2023) compares the performance of different neural operators. WaveBench (Liu et al., 2024) is a benchmark specifically aimed at wave propagation PDEs that are categorized into time-harmonic and time-varying problems. For a more detailed discussion of related benchmarks, see Appendix A.3. Contrary to prior work, AL4PDE is the first framework for evaluating and developing AL methods for neural PDE solvers.

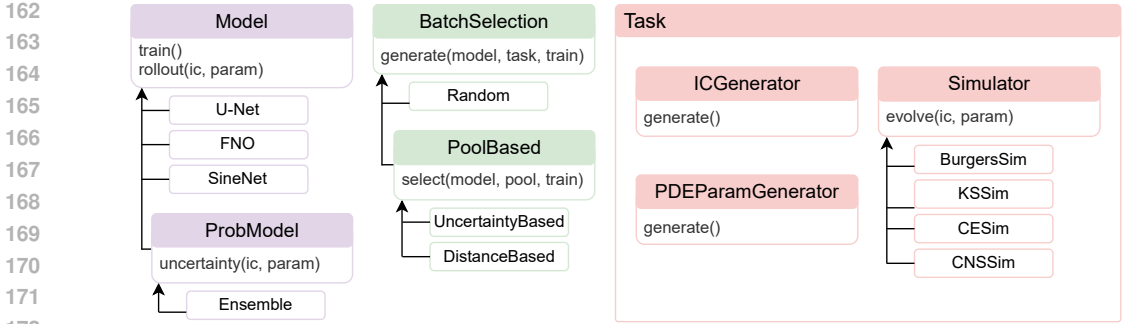

Figure 2: Structural overview of the AL4PDE benchmark.

## 4 AL4PDE: AN AL FRAMEWORK FOR NEURAL PDE SOLVERS

The AL4PDE benchmark consists of three major parts: (1) AL algorithms, (2) surrogate models, and (3) PDEs and the corresponding simulators. It follows a modular design to make the addition of new approaches or problems as easy as possible (Fig. 2). The following sections describe the AL approaches, including the general problem setup, acquisition and similarity functions, and batch selection strategies. Moreover, we describe the included PDEs and surrogate models.

### 4.1 PROBLEM DEFINITION AND SETUP

AL aims to select the most informative training samples so that the model can reach the same generalization error with fewer calls to the numerical solver. We measure the error using test trajectories on random samples from an input distribution  $p_T$ . Fig. 1 shows the full AL cycle. Since it requires retraining the NN(s) after each round, we use batch AL with sufficiently large batches. Specifically, in each round, a batch of simulator inputs  $\mathcal{S}_{\text{batch}} = \{\psi_1, \dots, \psi_{N_{\text{batch}}}\}$  is selected. It is then passed to the numerical solver, which computes the output trajectories using numerical approximation schemes. The new trajectories are then added to the training set, and the cycle is repeated.

We implement *pool-based* active learning methods, which select from a set of possible inputs  $\mathcal{S}_{\text{pool}} = \{\psi_1, \dots, \psi_{N_{\text{pool}}}\}$  called “pool”. The selected batch is then removed from the pool, simulated, and added to the training set  $\mathcal{S}_{\text{train}}$ :

$$\mathcal{S}_{\text{pool}} \leftarrow \mathcal{S}_{\text{pool}} \setminus \mathcal{S}_{\text{batch}}, \quad \mathcal{S}_{\text{train}} \leftarrow \mathcal{S}_{\text{train}} \cup \text{solve}(\mathcal{S}_{\text{batch}}). \quad (4)$$

We sample the pool set randomly from a proposal distribution  $\pi$ . In our experiments, we sample pool and test set from the same input distribution  $\pi = p_T$ , although  $p_T$  might not always be known in practice. Following common practice, the initial batch is selected randomly. Besides pool-based methods, our framework is also compatible with query-synthesis AL methods that are not restricted to a finite pool set. Several principles are useful for the design of AL methods (Wu, 2018): First, they should select highly *informative* samples that allow the model to reduce its uncertainty. Second, selecting inputs that are *representative* of the test input distribution at test time is often desirable. Third, the batch should be *diverse*, i.e., the individual samples should provide non-redundant information. The last point is particular to the batch setting, which is essential to maintain acceptable runtimes. In the following, we will investigate batch AL methods that first extract latent features or direct uncertainty estimates from the neural surrogate model for each sample in the pool and subsequently apply a selection method to construct the batch.

### 4.2 UNCERTAINTIES AND FEATURES

Since neural PDE solvers provide high-dimensional autoregressive rollouts without direct uncertainty predictions, many AL methods cannot be applied straightforwardly. In the AL4PDE framework, we select the following two different classes of methods: the uncertainty-based approach, which directly assigns an uncertainty score to each candidate, and the feature-based framework of Holzmüller et al. (2023), which uses features (or kernels) to evaluate the similarity between inputs.

**Uncertainties.** Epistemic uncertainty is often used as a measure of sample informativeness. While a more costly Bayesian approach is possible, we adopt the query-by-committee (QbC) approach (Seung et al., 1992), a simple but effective method that utilizes the variance between the ensemble members’ outputs as an uncertainty estimate:

$$a_{\text{QbC}}(\psi_i) := \frac{1}{N_t N_{\mathbf{x}} N_c} \sum_{j=1}^{N_t} \sum_{k=1}^{N_{\mathbf{x}}} \frac{1}{N_m} \sum_{m=1}^{N_m} \|\hat{\mathbf{u}}_{i,m}(t_j, \mathbf{x}_k) - \widehat{\mathbf{u}}_i(t_j, \mathbf{x}_k)\|_2^2. \quad (5)$$

Here,  $\widehat{\mathbf{u}}_i$  is the mean prediction of all  $N_m$  models with  $\widehat{\mathbf{u}}_i(t, \mathbf{x}) = \sum_m \hat{\mathbf{u}}_{i,m}(t, \mathbf{x})/N_m$ . The ensemble members produce different outputs  $\hat{\mathbf{u}}_i$  due to the inherent randomness resulting from the weight initialization and stochastic gradient descent. The assumption of QbC is that the variance of the ensemble member predictions correlates positively with the error. A high variance, therefore, points to a region of the input space where we need more data. Using the variance of the model outputs directly corresponds to minimizing the expected MSE. Note that many more error metrics can be considered for PDEs (Takamoto et al., 2022), for which measures other than the variance may be more appropriate.

**Features.** Many deep batch AL methods rely on some feature representation  $\phi(\psi) \in \mathbb{R}^p$  of inputs and utilize a distance metric in the feature space as a proxy for the similarity between inputs, which can help to ensure diversity of the selected batch. A typical representation is the inputs to the last neural network layer, but other representations are possible (Holzmüller et al., 2023). For neural PDE solvers, we compute the trajectory and concatenate the latent features at each timestep. Since this can result in very high-dimensional feature vectors, we follow Holzmüller et al. (2023) and apply Gaussian sketching. Specifically, we use  $\phi_{\text{sketch}}(\psi) := \mathbf{U}\phi(\psi)/\sqrt{p'} \in \mathbb{R}^{p'}$ , to reduce the feature space to a fixed dimension  $p'$  using a random matrix  $\mathbf{U} \in \mathbb{R}^{p' \times p}$  with i.i.d. standard Gaussian entries.

While ensemble-based AL methods can also be formulated in terms of feature maps (Kirsch, 2023), the use of latent features allows AL methods to work with a single model. Moreover, methods based on distances of latent features can naturally incorporate diversity into batch AL by avoiding the selection of highly similar examples. Feature-based AL methods are, however, not translation equivariant. In settings with periodic boundary conditions, an IC translated along the spatial axis will produce a trajectory shifted by the same amount. By using periodic padding within the convolutional layers of U-Net, the network is equivariant w.r.t. translations; hence, adding a translated version of the same IC is redundant. Uncertainty-based approaches based on ensembles are translation-invariant since all ensemble model outputs are shifted by the same amount and produce the same outputs. To make feature-based AL translation invariant, we take the spatial average over the features.

### 4.3 BATCH SELECTION STRATEGIES

Given uncertainties or features, we need to define a method to select a batch of pool samples. As a generic baseline, we compare to the selection of a (uniformly) **random** sampling of the inputs according to the input distribution,  $\psi \sim p_T(\psi)$ .

**Uncertainty-based selection strategies.** When given a single-sample acquisition function  $a$  such as the ensemble uncertainty, a simple and common approach to selecting a batch of  $k$  samples is **Top-K**, taking the  $k$  most uncertain samples. However, this does not ensure that the selected batch is diverse. To improve diversity, Kirsch et al. (2023) proposed stochastic batch active learning (**SBAL**). SBAL samples inputs  $\psi$  from the remaining pool set  $\mathcal{S}_{\text{pool}}$  without replacement according to the probability distribution  $p_{\text{power}}(\psi) \propto a(\psi)^m$ , where  $m$  is a hyperparameter controlling the sharpness of the distribution. Random sampling corresponds to  $m = 0$  and Top-K to  $m = \infty$ . The advantage of SBAL is that it selects samples from input regions that are not from the highest mode of the uncertainty distribution and encourages diversity.

**Feature-based selection strategies.** In the simpler version of their **Core-Set** algorithm, Sener & Savarese (2018) iteratively select the input from the remaining pool with the highest distance to the closest selected or labeled point. While Core-Set produces batches of diverse and informative samples, its objective is to cover the feature space uniformly. Hence, Core-Set in general does not select samples that are representative for the proposal distribution. To alleviate this issue, Holzmüller

et al. (2023) propose to replace the greedy Core-Set with **LCMD**, a similarly efficient method inspired by k-medoids clustering. LCMD interprets previously selected inputs as cluster centers, assigns all remaining pool points to their closest center, selects the cluster with the largest sum of squared distances to the center, and from this cluster selects the point that is furthest away from the center. The newly selected point then becomes a new center and the process is repeated until a batch of the desired size is obtained.

#### 4.4 PDEs

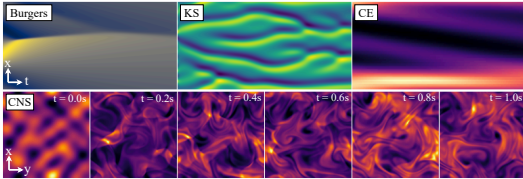

| PDE     | T in s | Sim. Res.<br>( $N_t, N_x, [N_y]$ ) | Train. Res.<br>( $N_t, N_x, [N_y]$ ) |
|---------|--------|------------------------------------|--------------------------------------|
| Burgers | 2      | (201, 1024)                        | (41, 256)                            |
| KS      | 40     | (801, 512)                         | (41, 256)                            |
| CE      | 4      | (501, 64)                          | (51, 64)                             |
| CNS     | 1      | (21, 128, 128)                     | (21, 64, 64)                         |

Figure 3: Example trajectories of the PDEs.

Table 1: Discretizations of the PDEs.

We consider 1D and 2D parametric PDEs, all with periodic boundary conditions. The first 1D PDE is the **Burgers'** equation from PDEBench (Takamoto et al., 2022) with kinematic viscosity  $\nu$ :  $\partial_t u + u\partial_x u = (\nu/\pi)\partial_{xx} u$ . Secondly, the Kuramoto–Sivashinsky (**KS**) equation,  $\partial_t u + u\partial_x u + \partial_{xx} u + \nu\partial_{xxxx} u = 0$ , from Lippe et al. (2023) demonstrates diverse dynamical behaviors, from fixed points and periodic limit cycles to chaos (Hyman & Nicolaenko, 1986). Next to the viscosity  $\nu$ , the domain length  $L$  is also varied. Thirdly, to test a multiphysics problem with more parameters, we include the so-called combined equation (**CE**) from Brandstetter et al. (2021) where we set the forcing term  $\delta = 0$ :  $\partial_t u + \partial_x (\alpha u^2 - \beta\partial_x u + \gamma\partial_{xx} u) = 0$ . Depending on the value of the PDE coefficients  $(\alpha, \beta, \gamma)$ , this equation recovers the Heat, Burgers, or the Korteweg-de-Vries PDE. For 2D, we use the compressible Navier-Stokes (**CNS**) equations from PDEBench (Takamoto et al., 2022),  $\partial_t \rho + \nabla \cdot (\rho \mathbf{v}) = 0$ ,  $\rho(\partial_t \mathbf{v} + \mathbf{v} \cdot \nabla \mathbf{v}) = -\nabla p + \eta \Delta \mathbf{v} + (\zeta + \eta/3)\nabla(\nabla \cdot \mathbf{v})$ ,  $\partial_t (\epsilon + \rho v^2/2) + \nabla \cdot [(p + \epsilon + \rho v^2/2)\mathbf{v} - \mathbf{v} \cdot \sigma'] = 0$ . The ICs are generated from random initial fields. Full details on PDEs, ICs, and the PDE parameter distributions can be found in Appendix B.

#### 4.5 NEURAL SURROGATE MODELS

Currently, the benchmark includes the following neural PDE solvers: (i) a recent version of U-Net (Ronneberger et al., 2015) from Gupta & Brandstetter (2023), (ii) SineNet (Zhang et al., 2024), which is an enhancement of the U-Net model that corrects the feature misalignment issue in the residual connections of modern U-Nets and can be considered a model with state of the art accuracy, specifically for advection-type equations, and (iii) the Fourier neural operator (FNO, Li et al., 2020b).

### 5 SELECTION OF EXPERIMENTS

We investigate (i) the impact of AL methods on the average error, (ii) the error distribution, (iii) the variance and reusability of the generated data, (iv) the temporal advantage of AL, and (v) conduct an ablation study concerning the different design choices of SBAL and LCMD. We use a smaller version of the modern U-Net from Gupta & Brandstetter (2023). We train the model on sub-trajectories (two steps) to strike a balance between learning auto-regressive rollouts and fast training. The training is performed with a cosine schedule, which reduces the learning rate from  $10^{-3}$  to  $10^{-5}$ . The batch size is set to 512 (CNS: 64). We use an exponential data schedule, i.e., in each AL iteration, the amount of data added is equal to the current training set size (Kirsch et al., 2023). For 1D equations, we start with 256 trajectories (2D: 128). The pool size is fixed to 100,000 candidates. The uncertainty is estimated using two ensemble members (for a fair comparison, just the first model of the ensemble is used to measure the error). For Burgers, we choose the parameter space  $\nu \in [0.001, 1)$  and sample values uniformly at random but on a logarithmic scale. For the KS equation, besides the viscosity  $\nu \in [0.5, 4)$ , we vary the domain length  $L \in [0.1, 100)$  as the second parameter. For CE, the parameter space is defined to be  $\alpha \in [0, 3)$ ,  $\beta \in [0, 0.4)$ ,  $\gamma \in [0, 1)$ . For the CNS equations, we

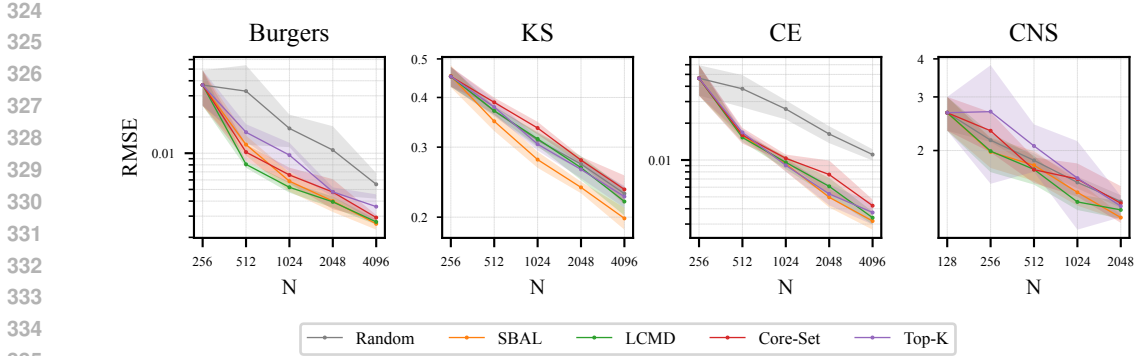

Figure 4: Error over the number of trajectories in the training set ( $N$ ). The shaded area represents the 95% confidence interval of the mean calculated over ten seeds for Burgers and five for the rest. AL can reduce the error relative to random sampling of the inputs on all tested PDEs but CNS, where the difference was not significant.

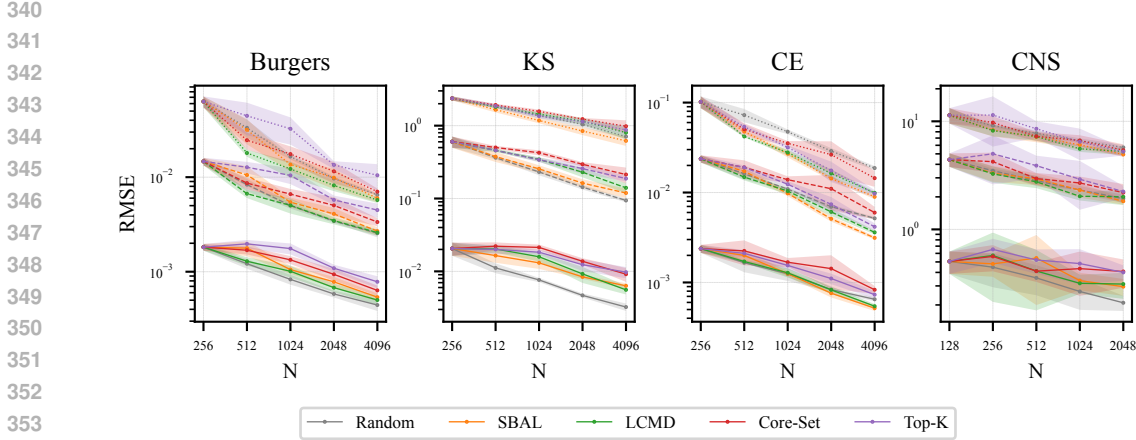

Figure 5: Error quantiles over the number of trajectories in the training set ( $N$ ). The 50%, 95%, and 99% quantiles are displayed using full, dashed, and dotted lines, respectively. AL especially improves the higher error quantiles, making the trained model more reliable.

set  $\eta, \zeta \in [10^{-4}, 10^{-1})$  and draw values on a logarithmic scale as with Burgers’ PDE. Additionally, we use random Mach numbers  $m \in [0.1, 1)$  for the IC generator. We repeat all experiments with five random seeds (Burgers: ten) and report the 95% confidence interval of the mean unless stated otherwise. The test set consists of 2048 trajectories simulated with random inputs drawn from  $p_T(\psi)$ .

**Comparison of AL methods.** Fig. 4 shows the RMSE for the various AL methods and PDEs. AL often reduces the error compared to sampling uniformly at random for the same amount of data. The advantage of AL is especially large for CE, which is likely due to the diverse dynamic regimes found in the PDE. SBAL and LCMD achieve similar errors on all PDEs with the exception of KS, where only SBAL can improve over random sampling. SBAL and LCMD can reach lower error values with only a quarter of the data points in the case of CE and Burgers. However, the greedy methods Top-K and Core-Set even increase the error for some PDEs. The difference in the CNS task was not significant, likely due to the performance of the base model training (see Fig. 8a) for a stronger model). Worst-case errors are of special interest when solving PDEs. Since we found the absolute maximum error to be unstable, we show the RMSE quantiles in Fig. 5. Notably, all AL algorithms reduce the higher quantiles while the 50 % percentile error is increased in some cases.

**Different Error Functions.** It is important to consider error metrics for surrogate model training besides the RMSE (Takamoto et al., 2022). Thus, we explore the impact of AL on the mean absolute error (MAE) as an example of an alternative metric. As depicted in Fig. 7b), SBAL, when using the



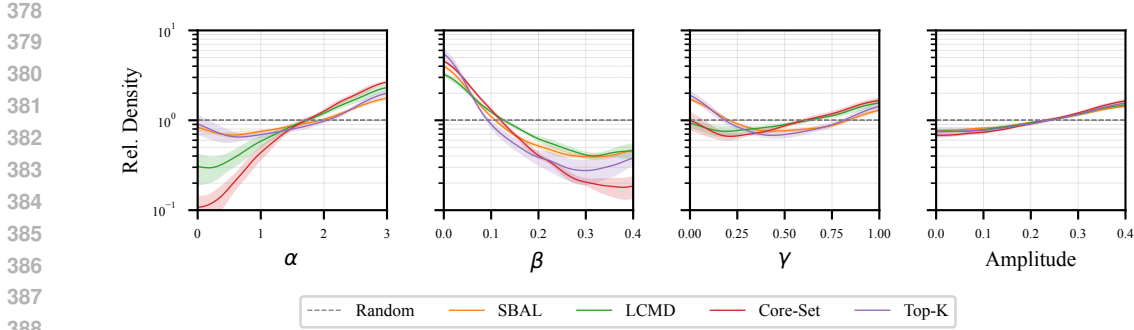

Figure 6: Marginal distribution of the PDE parameters ( $\alpha, \beta, \gamma$ ) for CE and the amplitudes of the IC in the training set generated by AL for CE (relative to the uniform distribution). The shaded area represents the standard deviation between the random seeds. All AL methods exhibit a small standard deviation, indicating that they reliably generate similar datasets between independent runs.

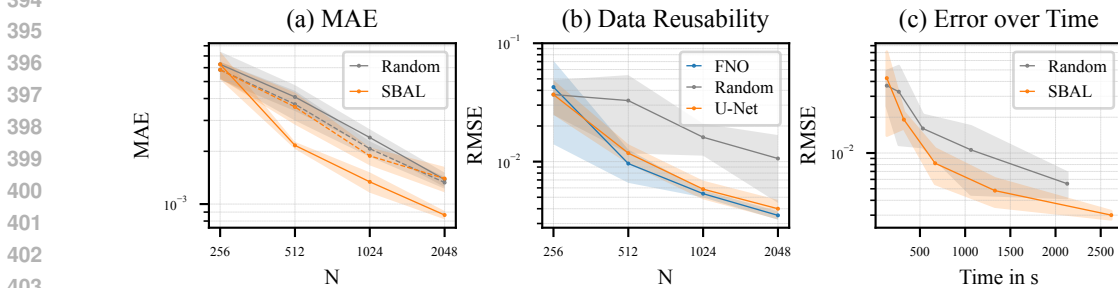

Figure 7: (a) AL with the MAE as the objective on Burgers, compared to the MAE of the same setup trained with the RMSE (dashed). Considering the desired error metric in the uncertainty estimate and training loss is essential. (b) Error of the standard U-Net on Burgers, with data generated using FNO or U-Net with SBAL. The selected data is also helpful for a model not used during AL. (c) Error of the standard U-Net on Burgers over the required total time. Using smaller FNOs to select the data, SBAL can provide smaller errors in the same amount of time.

absolute difference between the models as the uncertainty, can also successfully reduce the MAE. However, the MAE does not improve greatly relative to random sampling when the standard variance between the models is used. Hence, it is crucial to tailor the AL method to the relevant metric.

**Generated Datasets.** The marginal distributions of the PDE and the IC generator parameters implicitly sampled by AL are shown in Fig. 6 for CE. These distributions are highly similar for different random seeds, and thus, AL reliably selects similar training datasets. The various AL methods generally sample similar parameter values but can differ substantially in certain regions of the parameter space (Appendix F.3). In general, the methods appear to sample more in the region of the chaotic KdV equation ( $\alpha = 3, \beta = 0, \gamma = 1$ ). For  $\alpha$  and  $\gamma$ , a difference between the two QbC methods Top-K and SBAL to the feature-based ones LCMD and Core-Set is observable. Appendix F provides the distributions for all PDEs and visual examples. To investigate the effect of the generated data on other models, we use an FNO ensemble to select the data that we use to train the standard U-Net. Fig. 7b) depicts the error of the U-Net over the number of samples selected using the FNO ensemble, showing the selected data is beneficial for models not used for the AL-based data selection. The reusability of the data is especially important since, otherwise, the whole AL procedure would have to be repeated every time a new model is developed.

**Temporal Behavior.** The main experiments only provide the error over the number of data points since we use problems with rather fast solvers to accelerate the benchmarking of the AL methods. Additionally, a more lightweight model, trained for a shorter time, might be enough for data selection even if it does not reach the best possible accuracy. To investigate AL in terms of time efficiency



432  
433  
434  
435  
436  
437  
438  
439  
440  
441  
442  
443  
444  
445  
446  
447  
448  
449  
450  
451  
452  
453  
454  
455  
456  
457  
458  
459  
460  
461  
462  
463  
464  
465  
466  
467  
468  
469  
470  
471  
472  
473  
474  
475  
476  
477  
478  
479  
480  
481  
482  
483  
484  
485

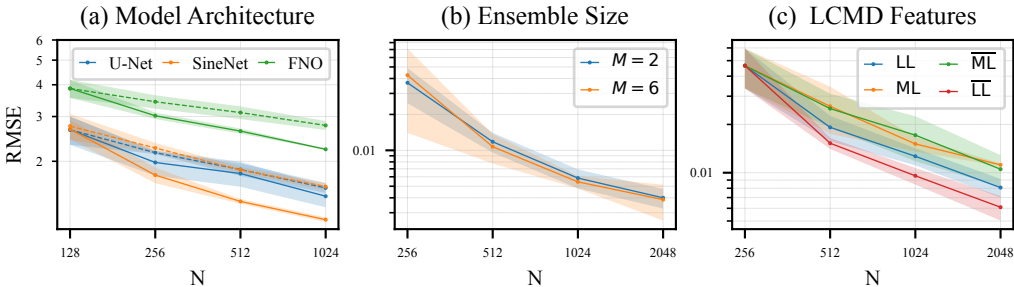

Figure 8: (a) Different base models on CNS using SBAL (solid) and random sampling (dashed). SBAL can also improve the accuracy of other models besides the U-Net. (b) Number of models  $M$  in the ensemble on Burgers. SBAL works reliably with only two models. (c) Comparison of different feature vectors LCMD on CE. Shown are the last layer feature map ( $\overline{LL}$ ), its spatial average ( $\overline{LL}$ ), as well as the features of the mid layer ( $\overline{ML}$ ) and its spatial average ( $\overline{ML}$ ). Averaging the feature maps improves the error, indicating the importance of considering the model invariances.

gains, we perform one experiment on the Burgers’ PDE, for which the numerical solver is the most expensive among all 1D PDEs due to its higher resolution. We use SBAL with an ensemble of smaller FNOs (See Appendix C.6 for more details). We train a regular U-Net on the AL collected data, which allows us to use a small, lightweight model for data selection only and an expensive one to evaluate the data selected. Fig. 7c) shows the accuracy of the evaluation U-Net over the cumulative time consumed for training the selection model, selecting the inputs, and simulation. For the random baseline, only the simulation time is considered. On Burgers, AL provides better accuracy for the same time budget.

**Ablations.** We ablate different design choices for the considered AL algorithms. For the SBAL algorithm, we investigate the base model architecture (Fig. 8a) and the ensemble size (Fig. 8b). On CNS, the accuracy of both SineNet and FNO can be significantly improved using SBAL, showing that AL is also helpful for other architectures. The improvement is even clearer than with the U-Net, which did not show a statistically significant advantage. Consistent with prior work (Pickering et al., 2022), choosing an ensemble size of two models is already sufficient (Fig. 8b). In general, the average uncertainty and error of a trajectory with two ensemble members are correlated with a Pearson coefficient of 0.41 on CE in the worst case up to 0.94 on CNS (Table 8). Fig. 8c) compares different feature choices for the LCMD algorithm, which are used to calculate the distances. Using the spatial average of the last layer features produces higher accuracy than using the full feature vector or the features from the bottleneck step in the middle of the U-Net. Thus, it is indeed important for distance-based selection to consider the equivariances of the problem in the distance function.

## 6 CONCLUSION

This paper introduces AL4PDE, an extensible framework to develop and evaluate AL algorithms for neural PDE solvers. AL4PDE includes four PDEs, surrogate models including U-Net, FNO, and SineNet, and AL algorithms such as SBAL and LCMD. An initial study shows that existing AL algorithms can already be advantageous for neural PDE solvers and can allow a model to reach the same accuracy with up to four times fewer data points. Thus, our work shows the potential of AL for making neural PDE solvers more data-efficient and reliable for future application cases. However, the experiments also showed that stable model training can be difficult depending on the base architecture (CNS). Such issues especially impact AL since the model is trained repeatedly with different data sets, and the data selection relies on the model. Hence, more work on the reliability of the surrogate model training is necessary. Another general open issue of AL is the question of how to select hyperparameters that work sufficiently well on the growing, unseen datasets during AL. To be closer to realistic engineering applications, future work should also consider more complex geometries and non-periodic boundary conditions, as well as irregular grids. AL could be especially helpful in such settings due to the inherently more complex input space from which to select.

486 REPRODUCIBILITY STATEMENT  
487

488 The code is available at [https://anonymous.4open.science/r/al4pde\\_benchmark](https://anonymous.4open.science/r/al4pde_benchmark). The repository  
489 contains the full configuration files of all reported experiments. Appendix B and C describe the main  
490 experimental as well as the model details. For reliable results, we repeat all experiments with ten  
491 seeds (Burgers) or five seeds (KS, CE, and CNS) and report the 95% confidence interval of the mean  
492 unless stated otherwise.

493  
494 REFERENCES  
495

496 Yuri Aikawa, Naonori Ueda, and Toshiyuki Tanaka. Improving the efficiency of training physics-  
497 informed neural networks using active learning. In *The 37th Annual Conference of the Japanese*  
498 *Society for Artificial Intelligence*, 2023.

499 Christopher J. Arthurs and Andrew P. King. Active training of physics-informed neural networks to  
500 aggregate and interpolate parametric solutions to the navier-stokes equations. *J. Comput. Phys.*,  
501 438:110364, 2021.

502 Jordan Ash, Surbhi Goel, Akshay Krishnamurthy, and Sham Kakade. Gone fishing: Neural active  
503 learning with fisher embeddings. *Advances in Neural Information Processing Systems*, 34:8927–  
504 8939, 2021.

505 Jordan T Ash, Chicheng Zhang, Akshay Krishnamurthy, John Langford, and Alekh Agarwal. Deep  
506 batch active learning by diverse, uncertain gradient lower bounds. In *International Conference on*  
507 *Learning Representations*, 2019.

508 Pradeep Bajracharya, Javier Quetzalcóatl Toledo-Marín, Geoffrey Fox, Shantenu Jha, and Linwei  
509 Wang. Feasibility study on active learning of smart surrogates for scientific simulations. *arXiv*  
510 *preprint arXiv:2407.07674*, 2024.

511 Johannes Brandstetter, Daniel E Worrall, and Max Welling. Message passing neural pde solvers. In  
512 *International Conference on Learning Representations*, 2021.

513 Johannes Brandstetter, Max Welling, and Daniel E Worrall. Lie point symmetry data augmentation  
514 for neural pde solvers. In *International Conference on Machine Learning*, pp. 2241–2256. PMLR,  
515 2022.

516 Johannes Brandstetter, Rianne van den Berg, Max Welling, and Jayesh K. Gupta. Clifford neural  
517 layers for PDE modeling. In *The Eleventh International Conference on Learning Representations*,  
518 *ICLR 2023, Kigali, Rwanda, May 1-5, 2023*, 2023.

519 Priyanshu Burark, Karn Tiwari, Meer Mehran Rashid, Prathosh A P, and N. M. Anoop Krishnan.  
520 Codbench: A critical evaluation of data-driven models for continuous dynamical systems. *CoRR*,  
521 abs/2310.01650, 2023.

522 Woojin Cho, Minju Jo, Haksoo Lim, Kookjin Lee, Dongeun Lee, Sanghyun Hong, and Noseong  
523 Park. Parameterized physics-informed neural networks for parameterized PDEs. In *Proceedings of*  
524 *the 41st International Conference on Machine Learning*, volume 235 of *Proceedings of Machine*  
525 *Learning Research*, pp. 8510–8533. PMLR, 21–27 Jul 2024.

526 Gideon Dresdner, Dmitrii Kochkov, Peter Christian Norgaard, Leonardo Zepeda-Nunez, Jamie Smith,  
527 Michael Brenner, and Stephan Hoyer. Learning to correct spectral methods for simulating turbulent  
528 flows. *Transactions on Machine Learning Research*, 2023.

529 Wenhan Gao and Chunmei Wang. Active learning based sampling for high-dimensional nonlinear  
530 partial differential equations. *Journal of Computational Physics*, 475:111848, 2023.

531 Yonatan Geifman and Ran El-Yaniv. Deep active learning over the long tail. *arXiv preprint*  
532 *arXiv:1711.00941*, 2017.

533 Jayesh K Gupta and Johannes Brandstetter. Towards multi-spatiotemporal-scale generalized pde  
534 modeling. *Transactions on Machine Learning Research*, 2023.

- 540 Jan Hagnberger, Marimuthu Kalimuthu, Daniel Musekamp, and Mathias Niepert. Vectorized con-  
541 ditional neural fields: A framework for solving time-dependent parametric partial differential  
542 equations. In *Proceedings of the 41st International Conference on Machine Learning*, volume 235  
543 of *Proceedings of Machine Learning Research*, pp. 17189–17223. PMLR, 21–27 Jul 2024.
- 544 Zhongkai Hao, Jiachen Yao, Chang Su, Hang Su, Ziao Wang, Fanzhi Lu, Zeyu Xia, Yichi Zhang,  
545 Songming Liu, Lu Lu, and Jun Zhu. PINNacle: A comprehensive benchmark of physics-informed  
546 neural networks for solving pdes. *CoRR*, abs/2306.08827, 2023.
- 547 Sheikh Md Shakeel Hassan, Arthur Feeney, Akash Dhruv, Jihoon Kim, Youngjoon Suh, Jaiyoung  
548 Ryu, Yoonjin Won, and Aparna Chandramowliswaran. Bubbleml: A multiphase multiphysics  
549 dataset and benchmarks for machine learning. In *Advances in Neural Information Processing*  
550 *Systems*, 2023.
- 551 Dan Hendrycks and Kevin Gimpel. Gaussian error linear units (gelus). *arXiv preprint*  
552 *arXiv:1606.08415*, 2016.
- 553 David Holzmüller, Viktor Zaverkin, Johannes Kästner, and Ingo Steinwart. A framework and  
554 benchmark for deep batch active learning for regression. *J. Mach. Learn. Res.*, 24:164:1–164:81,  
555 2023.
- 556 James M Hyman and Basil Nicolaenko. The kuramoto-sivashinsky equation: a bridge between pde’s  
557 and dynamical systems. *Physica D: Nonlinear Phenomena*, 18(1-3):113–126, 1986.
- 558 Steeven Janny, Aurélien Béneteau, Madiha Nadri, Julie Digne, Nicolas Thome, and Christian Wolf.  
559 EAGLE: large-scale learning of turbulent fluid dynamics with mesh transformers. In *The Eleventh*  
560 *International Conference on Learning Representations, ICLR 2023, Kigali, Rwanda, May 1-5,*  
561 *2023*, 2023.
- 562 Taniya Kapoor, Abhishek Chandra, Daniel Tartakovsky, Hongrui Wang, Alfredo Núñez, and Rolf  
563 Dollevoet. Neural oscillators for generalizing parametric pdes. In *The Symbiosis of Deep Learning*  
564 *and Differential Equations III*, 2023.
- 565 Yoon-Yeong Kim, Kyungwoo Song, JoonHo Jang, and Il-Chul Moon. LADA: Look-Ahead Data  
566 Acquisition via augmentation for deep active learning. *Advances in Neural Information Processing*  
567 *Systems*, 34:22919–22930, 2021.
- 568 Andreas Kirsch. Black-box batch active learning for regression. *Transactions on Machine Learning*  
569 *Research*, 2023.
- 570 Andreas Kirsch, Sebastian Farquhar, Parmida Atighehchian, Andrew Jesson, Frédéric Branchaud-  
571 Charron, and Yarin Gal. Stochastic batch acquisition: A simple baseline for deep active learning.  
572 *Transactions on Machine Learning Research*, 2023.
- 573 Samuel Lanthaler, Roberto Molinaro, Patrik Hadorn, and Siddhartha Mishra. Nonlinear reconstruction  
574 for operator learning of pdes with discontinuities. In *The Eleventh International Conference on*  
575 *Learning Representations, ICLR*. OpenReview.net, 2023.
- 576 Samuel Lanthaler, Zongyi Li, and Andrew M. Stuart. Nonlocality and nonlinearity implies universality  
577 in operator learning. *CoRR*, 2024.
- 578 H Lewy, K Friedrichs, and R Courant. Über die partiellen differenzengleichungen der mathematischen  
579 physik. *Mathematische annalen*, 100:32–74, 1928.
- 580 Shibo Li, Wei Xing, Robert Kirby, and Shandian Zhe. Multi-fidelity bayesian optimization via deep  
581 neural networks. *Advances in Neural Information Processing Systems*, 33:8521–8531, 2020a.
- 582 Shibo Li, Robert Kirby, and Shandian Zhe. Batch multi-fidelity bayesian optimization with deep  
583 auto-regressive networks. *Advances in Neural Information Processing Systems*, 34:25463–25475,  
584 2021.
- 585 Shibo Li, Xin Yu, Wei Xing, Mike Kirby, Akil Narayan, and Shandian Zhe. Multi-resolution active  
586 learning of fourier neural operators. *arXiv preprint arXiv:2309.16971*, 2023.

- 594 Zongyi Li, Nikola Kovachki, Kamyar Azizzadenesheli, Burigede Liu, Kaushik Bhattacharya, Andrew  
595 Stuart, and Anima Anandkumar. Fourier neural operator for parametric partial differential equations.  
596 *arXiv preprint arXiv:2010.08895*, 2020b.
- 597  
598 Phillip Lippe, Bas Veeling, Paris Perdikaris, Richard E. Turner, and Johannes Brandstetter. Pde-refiner:  
599 Achieving accurate long rollouts with neural PDE solvers. In *Advances in Neural Information*  
600 *Processing Systems*, 2023.
- 601 Tianlin Liu, Jose Antonio Lara Benitez, Amirehsan Khorashadizadeh, Florian Faucher, Maarten V  
602 de Hoop, and Ivan Dokmanić. Wavebench: Benchmarking data-driven solvers for linear wave  
603 propagation pdes. *Transactions on Machine Learning Research Journal*, 2024.
- 604 Turab Lookman, Prasanna V Balachandran, Dezhen Xue, and Ruihao Yuan. Active learning in  
605 materials science with emphasis on adaptive sampling using uncertainties for targeted design. *npj*  
606 *Computational Materials*, 5(1):21, 2019.
- 607  
608 Lu Lu, Pengzhan Jin, and George Em Karniadakis. Deeponet: Learning nonlinear operators for  
609 identifying differential equations based on the universal approximation theorem of operators. *arXiv*  
610 *preprint arXiv:1910.03193*, 2019.
- 611 Yining Luo, Yingfa Chen, and Zhen Zhang. Cfdbench: A comprehensive benchmark for machine  
612 learning methods in fluid dynamics. *CoRR*, abs/2310.05963, 2023.
- 613  
614 Zhiping Mao and Xuhui Meng. Physics-informed neural networks with residual/gradient-based  
615 adaptive sampling methods for solving partial differential equations with sharp solutions. *Applied*  
616 *Mathematics and Mechanics*, 44(7):1069–1084, 2023.
- 617 Venkata Vamsikrishna Meduri, Lucian Popa, Prithviraj Sen, and Mohamed Sarwat. A comprehensive  
618 benchmark framework for active learning methods in entity matching. In *Proceedings of the 2020*  
619 *ACM SIGMOD international conference on management of data*, pp. 1133–1147, 2020.
- 620  
621 Arash Mehrjou, Ashkan Soleymani, Andrew Jesson, Pascal Notin, Yarin Gal, Stefan Bauer, and  
622 Patrick Schwab. Genedisco: A benchmark for experimental design in drug discovery. In *Internat-*  
623 *ional Conference on Learning Representations*, 2021.
- 624 S. Chandra Mouli, Danielle C. Maddix, Shima Alizadeh, Gaurav Gupta, Andrew Stuart, Michael W.  
625 Mahoney, and Yuyang Wang. Using uncertainty quantification to characterize and improve out-  
626 of-domain learning for pdes. In *International Conference on Machine Learning, ICML*, volume  
627 abs/2403.10642 of *Proceedings of Machine Learning Research*. PMLR, 2024.
- 628 Maliki Moustapha, Stefano Marelli, and Bruno Sudret. Active learning for structural reliability:  
629 Survey, general framework and benchmark. *Structural Safety*, 96:102174, 2022.
- 630  
631 Oded Ovadia, Eli Turkel, Adar Kahana, and George Em Karniadakis. Ditto: Diffusion-inspired  
632 temporal transformer operator. *CoRR*, abs/2307.09072, 2023.
- 633 Raphaël Pestourie, Youssef Mroueh, Thanh V Nguyen, et al. Active learning of deep surrogates for  
634 pdes: application to metasurface design. *Computational Materials*, 6(1):164, 2020.
- 635  
636 Raphaël Pestourie, Youssef Mroueh, Christopher Vincent Rackauckas, Payel Das, and Steven Glenn  
637 Johnson. Data-efficient training with physics-enhanced deep surrogates. In *AAAI 2022 Workshop*  
638 *on AI for Design and Manufacturing (ADAM)*, 2021.
- 639 Raphaël Pestourie, Youssef Mroueh, Chris Rackauckas, Payel Das, and Steven G. Johnson. Physics-  
640 enhanced deep surrogates for partial differential equations. *Nat. Mac. Intell.*, 5(12):1458–1465,  
641 2023.
- 642  
643 Ethan Pickering, Stephen Guth, George Em Karniadakis, and Themistoklis P Sapsis. Discovering and  
644 forecasting extreme events via active learning in neural operators. *Nature Computational Science*,  
645 2(12):823–833, 2022.
- 646 Robert Pinsler, Jonathan Gordon, Eric Nalisnick, and José Miguel Hernández-Lobato. Bayesian  
647 batch active learning as sparse subset approximation. *Advances in neural information processing*  
*systems*, 32, 2019.

- 648 Apostolos F. Psaros, Xuhui Meng, Zongren Zou, Ling Guo, and George Em Karniadakis. Uncertainty  
649 quantification in scientific machine learning: Methods, metrics, and comparisons. *J. Comput.*  
650 *Phys.*, 477:111902, 2023.
- 651
- 652 Md Ashiqur Rahman, Zachary E. Ross, and Kamyar Azizzadenesheli. U-NO: u-shaped neural  
653 operators. *Transactions on Machine Learning Research*, abs/2204.11127, 2022.
- 654
- 655 Maziar Raissi, Paris Perdikaris, and George E Karniadakis. Physics-informed neural networks: A  
656 deep learning framework for solving forward and inverse problems involving nonlinear partial  
657 differential equations. *Journal of Computational physics*, 378:686–707, 2019.
- 658
- 659 Lukas Rauch, Matthias Aßenmacher, Denis Huseljic, Moritz Wirth, Bernd Bischl, and Bernhard  
660 Sick. Activeglae: A benchmark for deep active learning with transformers. In *Joint European  
661 Conference on Machine Learning and Knowledge Discovery in Databases*, pp. 55–74. Springer,  
2023.
- 662
- 663 Simiao Ren, Yang Deng, Willie J. Padilla, Leslie M. Collins, and Jordan M. Malof. Deep active  
664 learning for scientific computing in the wild. *CoRR*, abs/2302.00098, 2023.
- 665
- 666 Olaf Ronneberger, Philipp Fischer, and Thomas Brox. U-net: Convolutional networks for biomedical  
667 image segmentation. In *Medical image computing and computer-assisted intervention—MICCAI  
2015: 18th international conference*, pp. 234–241. Springer, 2015.
- 668
- 669 Francisco Sahli Costabal, Yibo Yang, Paris Perdikaris, Daniel E Hurtado, and Ellen Kuhl. Physics-  
670 informed neural networks for cardiac activation mapping. *Frontiers in Physics*, 8:42, 2020.
- 671
- 672 Ozan Sener and Silvio Savarese. Active learning for convolutional neural networks: A core-set  
673 approach. In *International Conference on Learning Representations*, 2018.
- 674
- 675 H Sebastian Seung, Manfred Opper, and Haim Sompolinsky. Query by committee. In *Proceedings of  
the fifth annual workshop on Computational learning theory*, pp. 287–294, 1992.
- 676
- 677 Makoto Takamoto, Timothy Praditia, Raphael Leiteritz, Daniel MacKinlay, Francesco Alesiani, Dirk  
678 Pflüger, and Mathias Niepert. Pdebench: An extensive benchmark for scientific machine learning.  
679 In *NeurIPS*, 2022.
- 680
- 681 Makoto Takamoto, Francesco Alesiani, and Mathias Niepert. Learning neural PDE solvers with  
682 parameter-guided channel attention. In *International Conference on Machine Learning, ICML*,  
volume 202 of *Proceedings of Machine Learning Research*, pp. 33448–33467. PMLR, 2023.
- 683
- 684 Akshay Thakur. Uncertainty Quantification for Signal-to-Signal Regression-Based Neural Operator  
685 Frameworks. 7 2023.
- 686
- 687 Artur P. Toshev, Gianluca Galletti, Fabian Fritz, Stefan Adami, and Nikolaus A. Adams. La-  
688 grangebench: A lagrangian fluid mechanics benchmarking suite. In *Advances in Neural Informa-  
tion Processing Systems*, 2023.
- 689
- 690 Evgenii Tsymbalov, Maxim Panov, and Alexander Shapeev. Dropout-based active learning for  
691 regression. In *Analysis of Images, Social Networks and Texts: 7th International Conference, AIST  
2018, Moscow, Russia, July 5–7, 2018, Revised Selected Papers 7*, pp. 247–258. Springer, 2018.
- 692
- 693 Ashish Vaswani, Noam Shazeer, Niki Parmar, Jakob Uszkoreit, Llion Jones, Aidan N Gomez, Łukasz  
694 Kaiser, and Illia Polosukhin. Attention is all you need. *Advances in neural information processing  
695 systems*, 30, 2017.
- 696
- 697 Alex Wang, Haotong Liang, Austin McDannald, Ichiro Takeuchi, and Aaron Gilad Kusne. Bench-  
698 marking active learning strategies for materials optimization and discovery. *Oxford Open Materials  
699 Science*, 2(1):itac006, 2022.
- 700
- 701 Hong Wang, Zhongkai Hao, Jie Wang, Zijie Geng, Zhen Wang, Bin Li, and Feng Wu. Accelerating  
data generation for neural operators via krylov subspace recycling. In *The Twelfth International  
Conference on Learning Representations*, 2023.

- 702 Tobias Weber, Emilia Magnani, Marvin Pförtner, and Philipp Hennig. Uncertainty quantification for  
703 fourier neural operators. In *ICLR 2024 Workshop on AI4DifferentialEquations In Science*, 2024.  
704
- 705 Chenxi Wu, Min Zhu, Qinyang Tan, Yadhu Kartha, and Lu Lu. A comprehensive study of non-  
706 adaptive and residual-based adaptive sampling for physics-informed neural networks. *Computer*  
707 *Methods in Applied Mechanics and Engineering*, 403:115671, 2023a.
- 708 Dongrui Wu. Pool-based sequential active learning for regression. *IEEE transactions on neural*  
709 *networks and learning systems*, 30(5):1348–1359, 2018.  
710
- 711 Dongxia Wu, Ruijia Niu, Matteo Chinazzi, Yian Ma, and Rose Yu. Disentangled multi-fidelity deep  
712 bayesian active learning. In *International Conference on Machine Learning*, pp. 37624–37634.  
713 PMLR, 2023b.
- 714 Dongxia Wu, Ruijia Niu, Matteo Chinazzi, Alessandro Vespignani, Yi-An Ma, and Rose Yu. Deep  
715 bayesian active learning for accelerating stochastic simulation. In *Proceedings of the 29th ACM*  
716 *SIGKDD Conference on Knowledge Discovery and Data Mining*, pp. 2559–2569, 2023c.  
717
- 718 Tailin Wu, Willie Neiswanger, Hongtao Zheng, Stefano Ermon, and Jure Leskovec. Uncertainty  
719 quantification for forward and inverse problems of pdes via latent global evolution. In *Thirty-Eighth*  
720 *AAAI Conference on Artificial Intelligence*, AAAI, pp. 320–328. AAAI Press, 2024.
- 721 Yuxin Wu and Kaiming He. Group normalization. In *Proceedings of the European conference on*  
722 *computer vision (ECCV)*, pp. 3–19, 2018.  
723
- 724 Yazhou Yang and Marco Loog. A benchmark and comparison of active learning for logistic regression.  
725 *Pattern Recognition*, 83:401–415, 2018.
- 726 Viktor Zaverkin, David Holzmüller, Ingo Steinwart, and Johannes Kästner. Exploring chemical and  
727 conformational spaces by batch mode deep active learning. *Digital Discovery*, 1:605–620, 2022.  
728
- 729 Viktor Zaverkin, David Holzmüller, Henrik Christiansen, Federico Errica, Francesco Alesiani, Makoto  
730 Takamoto, Mathias Niepert, and Johannes Kästner. Uncertainty-biased molecular dynamics for  
731 learning uniformly accurate interatomic potentials. *npj Computational Materials*, 10(1):83, 2024.
- 732 Xueying Zhan, Huan Liu, Qing Li, and Antoni B Chan. A comparative survey: Benchmarking for  
733 pool-based active learning. In *IJCAI*, pp. 4679–4686, 2021.  
734
- 735 Xuan Zhang, Jacob Helwig, Yuchao Lin, Yaochen Xie, Cong Fu, Stephan Wojtowysch, and Shuiwang  
736 Ji. Sinenet: Learning temporal dynamics in time-dependent partial differential equations. *CoRR*,  
737 abs/2403.19507, 2024.  
738  
739  
740  
741  
742  
743  
744  
745  
746  
747  
748  
749  
750  
751  
752  
753  
754  
755



756  
757  
758  
759  
760  
761  
762  
763  
764  
765  
766  
767  
768  
769  
770  
771  
772  
773  
774  
775  
776  
777  
778  
779  
780  
781  
782  
783  
784  
785  
786  
787  
788  
789  
790  
791  
792  
793  
794  
795  
796  
797  
798  
799  
800  
801  
802  
803  
804  
805  
806  
807  
808  
809

---

# ACTIVE LEARNING FOR NEURAL PDE SOLVERS

## SUPPLEMENTAL MATERIAL

---

|          |                                                          |           |
|----------|----------------------------------------------------------|-----------|
| <b>A</b> | <b>Additional Background on Related Work</b>             | <b>16</b> |
| A.1      | General Active Learning . . . . .                        | 16        |
| A.2      | Uncertainty Quantification (UQ) . . . . .                | 16        |
| A.3      | Further Scientific Machine Learning Benchmarks . . . . . | 16        |
| <b>B</b> | <b>Additional Problem Details</b>                        | <b>17</b> |
| B.1      | Burgers' Equation . . . . .                              | 17        |
| B.2      | Kuramoto-Sivashinsky (KS) . . . . .                      | 17        |
| B.3      | Combined Equation (CE) . . . . .                         | 18        |
| B.4      | Compressible Navier-Stokes (CNS) . . . . .               | 18        |
| <b>C</b> | <b>Additional Model and Training Details</b>             | <b>18</b> |
| C.1      | Fourier Neural Operators (FNOs) . . . . .                | 18        |
| C.2      | U-shaped Networks (U-Nets) . . . . .                     | 19        |
| C.3      | SineNet . . . . .                                        | 19        |
| C.4      | Hyperparameters and Training Protocols . . . . .         | 19        |
| C.5      | Hardware and Runtime . . . . .                           | 19        |
| C.6      | Timing Experiment . . . . .                              | 20        |
| <b>D</b> | <b>Framework Overview</b>                                | <b>21</b> |
| <b>E</b> | <b>Detailed Results</b>                                  | <b>24</b> |
| <b>F</b> | <b>Overview of the Generated Datasets</b>                | <b>28</b> |
| F.1      | Example Trajectories . . . . .                           | 28        |
| F.2      | IC Parameter Marginal Distributions . . . . .            | 32        |
| F.3      | PDE Parameter Marginal Distributions . . . . .           | 34        |

## A ADDITIONAL BACKGROUND ON RELATED WORK

In this section, we elaborate on related works that tackle active learning in relevant settings and problems discussed here. Moreover, we summarize related work on uncertainty quantification and SciML benchmarks closely related to the proposed AL4PDE benchmark.

### A.1 GENERAL ACTIVE LEARNING

Most AL algorithms are evaluated on classic image classification datasets (Ash et al., 2021; 2019) and many benchmarks also consider the more common classification setting (Rauch et al., 2023; Yang & Loog, 2018; Zhan et al., 2021). There is also work on specialized tasks such as entity matching (Meduri et al., 2020), structural integrity (Moustapha et al., 2022), material science (Wang et al., 2022), or drug discovery (Mehrjou et al., 2021). Holzmüller et al. (2023) present a benchmark for AL of single-output, tabular regression tasks. Wu et al. (2023a) study different adaptive and non-adaptive methods for selecting collocation points for PINNs. Ren et al. (2023) benchmark pool-based AL methods on simulated, mostly tabular regression tasks.

In terms of deep active learning methods for regression, there are multiple approaches: Query-by-committee (Seung et al., 1992) uses ensemble prediction variances as uncertainties. Tsymbalov et al. (2018) use Monte Carlo dropout to obtain uncertainties; however, their method is only applicable by training with dropout. Approaches based on last-layer Bayesian linear regression (Pinsler et al., 2019; Ash et al., 2021) are often convenient since they do not require ensembles or dropout. These methods are applicable in principle in our setting but lose their original Bayesian interpretation since the last layer of a neural operator is applied multiple times during the autoregressive rollout. Distance-based methods like Core-Set (Sener & Savarese, 2018; Geifman & El-Yaniv, 2017) and the clustering-based LCMD (Holzmüller et al., 2023) exhibit better runtime complexity than last-layer Bayesian methods while sharing their other advantages (Holzmüller et al., 2023). Since these algorithms just require some distance function between two input points, we can adapt them to the neural PDE solver setting in Section 4.2.

### A.2 UNCERTAINTY QUANTIFICATION (UQ)

Uncertainty quantification has been studied in the context of SciML simulations. Psaros et al. (2023) provide a detailed overview of UQ methods in SciML, specifically for PINNs and DeepONets. However, effective and reliable UQ methods for neural operators (i.e., mapping between function spaces) and high dimensionality of data, which is common in PDE solving, remain challenging.

**Neural PDE Solvers.** LE-PDE-UQ (Wu et al., 2024) deals with a method to estimate the uncertainty of neural operators by modeling the dynamics in the latent space. The model has been shown to outperform other UQ approaches, such as Bayes layer, Dropout, and L2 regularization on Navier-Stokes turbulent flow prediction tasks. Unlike the considered setting in our case, the model utilizes a history of 10 timesteps and has been tested only on a fixed PDE parameter. Hence, it is unclear whether the robustness of this approach remains when these settings change.

Mouli et al. (2024) aim to develop a cost-efficient method for uncertainty quantification of parametric PDEs, specifically one that works well in the out-of-domain test settings of PDE parameters. First, the study shows the challenges of existing UQ methods, such as the Bayesian neural operator (BayesianNO) for out-of-domain test data. It then shows that ensembling several neural operators is an effective strategy for UQ that is well-correlated with prediction errors and proposes diverse neural operators (DiverseNO) as a cost-effective way to estimate uncertainty with just a single model based on FNO outputting multiple predictions.

Thakur (2023) studies UQ in the context of neural operators and develops a probabilistic FNO model to quantify aleatoric and epistemic uncertainties. Weber et al. (2024) study UQ for FNO and propose a Laplace approximation for the Fourier layer to effectively compute uncertainty.

### A.3 FURTHER SCIENTIFIC MACHINE LEARNING BENCHMARKS

In recent years, various benchmarks and datasets for SciML have been published. We outline some of the major open-source benchmarks below.

PDEBench (Takamoto et al., 2022) is a large-scale SciML benchmark of 1D to 3D PDE equations modeling hydrodynamics ranging from Burgers’ to compressible and incompressible Navier-Stokes equations. PDEArena (Gupta & Brandstetter, 2023) is a modern surrogate modeling benchmark including PDEs such as incompressible Navier-Stokes, Shallow Water, and Maxwell equations (Brandstetter et al., 2023). CFDBench (Luo et al., 2023) is a recent benchmark comprising four flow problems, each with three different *operating parameters*, the specific instantiations of which include varying boundary conditions, physical properties, and geometry of the fluid. The benchmark compares the generalization capabilities of a range of neural operators and autoregressive models for each of the said *operating parameters*. LagrangeBench (Toshev et al., 2023) is a large-scale benchmark suite for modeling 2D and 3D fluid mechanics problems based on the Lagrangian specification of the flow field. The benchmark provides both datasets and baseline models. For the former, it introduces seven datasets of varying Reynolds numbers by solving a weak form of NS equations using smoothed particle hydrodynamics. For the latter, efficient JAX implementations of GNN baseline models such as Graph Network-based Simulator and (Steerable) Equivariant GNN are included. EAGLE (Janny et al., 2023) introduces an industrial-grade dataset of non-steady fluid mechanics simulations encompassing 600 geometries and 1.1 million 2D meshes. In addition, to effectively process a dataset of this scale, the benchmark proposes an efficient multi-scale attention model, mesh transformer, to capture long-range dependencies in the simulation. BubbleML (Hassan et al., 2023) is a thermal simulations dataset comprising boiling scenarios that exhibit multiphase and multiphysics phase change phenomena. It also consists of a benchmark validating the dataset against U-Nets and several variants of FNO.

## B ADDITIONAL PROBLEM DETAILS

In the following section, we will discuss the tasks considered in detail. Table 1 shows the temporal and spatial resolution of the considered PDEs.

### B.1 BURGERS’ EQUATION

The 1D Burgers’ equation is written as

$$\partial_t u + u \partial_x u = (\nu/\pi) \partial_{xx} u. \quad (6)$$

The spatial domain is set to  $x \in [0, 1]$ . Following the parameter spacing of the PDE parameters values in PDEBench (Takamoto et al., 2022) and CAPE (Takamoto et al., 2023), we draw them on a logarithmic scale, i.e., we first draw  $\lambda_{i,\text{normed}}$  uniformly from  $[0, 1)$  and then transform the parameter to its domain  $[a_i, b_i)$  using

$$\lambda_i = a_i \exp(\log(b_i/a_i) \lambda_{i,\text{normed}}). \quad (7)$$

We use the FDM-based JAX simulator and the initial condition generator from PDEBench (Takamoto et al., 2022). The ICs are constructed based on a superposition of sinusoidal waves (Takamoto et al., 2022),

$$\mathbf{u}^0(x) = \sum_{i=1}^{N_w} A_i \sin(2\pi k_i x/L + \phi_i) \quad (8)$$

where the wave number  $k_i$  is an integer sampled uniformly from  $[1, 5)$ , amplitude  $A_i$  is sampled uniformly from  $[0, 1)$ , and phase  $\phi_i$  from  $[0, 2\pi)$ . The number of waves  $N_w$  is set to 2. Windowing is applied afterward with a probability of 10%, where all parts of the IC are set to zero outside of  $[x_L, x_R]$ .  $x_L$  is drawn uniformly from  $[0.1, 0.45)$  and  $x_R$  from  $[0.55, 0.9)$ . Lastly, the sign of  $\mathbf{u}^0$  is flipped for all entries with a probability of 10%.

### B.2 KURAMOTO-SIVASHINSKY (KS)

The 1D KS equation reads as

$$\partial_t u + u \partial_x u + \partial_{xx} u + \nu \partial_{xxxx} u = 0 \quad x \in [0, L]. \quad (9)$$

The ICs are generated using the superposition of sinusoidal waves (Eq. (8)), but  $k_i$  is sampled from  $[1, 10)$ ,  $A_i$  from  $[-1, 1)$  and  $\phi_i$  from  $[0, 2\pi)$ . No windowing or sign flips are applied. The total

number of waves  $N_w$  in this case is set to 10. Since we cannot omit the first part of the simulations as Lippe et al. (2023), we reduce the simulation time to 40s, but allow for more variance in the ICs to reach the chaotic behavior easier by increasing the number of wave functions of the IC. The trajectories are obtained using JAX-CFD (Dresdner et al., 2023). The PDE parameters are drawn uniformly from their range (no logarithmic scale).

### B.3 COMBINED EQUATION (CE)

We adopt the *combined equation* albeit without the *forcing* term and the corresponding numerical solver from Brandstetter et al. (2021).

$$\partial_t u + \partial_x (\alpha u^2 - \beta \partial_x u + \gamma \partial_{xx} u) = 0 \quad (10)$$

As for the IC, the domain of  $k_i$  is set to  $[1, 3]$  and for  $A_i$  it is set as  $[-0.4, 0.4]$ . The number of waves  $N_w$  is set to 5, and no windowing or sign flips are applied either. The PDE parameters are also drawn uniformly from their range. Depending on the choice of the PDE coefficients  $(\alpha, \beta, \gamma)$ , this equation recovers the Heat  $(0, 1, 0)$ , Burgers  $(0.5, 1, 0)$ , or the Korteweg-de-Vries  $(3, 0, 1)$  PDE. The spatial domain is set to  $x \in [0, 16]$ .

### B.4 COMPRESSIBLE NAVIER-STOKES (CNS)

The 2D CNS equations from PDEBench (Takamoto et al., 2022) are written as

$$\partial_t \rho + \nabla \cdot (\rho \mathbf{v}) = 0, \quad (11a)$$

$$\rho(\partial_t \mathbf{v} + \mathbf{v} \cdot \nabla \mathbf{v}) = -\nabla p + \eta \Delta \mathbf{v} + (\zeta + \eta/3) \nabla(\nabla \cdot \mathbf{v}), \quad (11b)$$

$$\partial_t (\epsilon + \rho v^2/2) + \nabla \cdot [(p + \epsilon + \rho v^2/2) \mathbf{v} - \mathbf{v} \cdot \sigma'] = \mathbf{0}, \quad (11c)$$

where  $\sigma'$  is the viscous tensor. The equation has four channels (density  $\rho$ , velocity x-component  $v_x$  and y-component  $v_y$  as well as the pressure  $p$ ). The spatial domain is set to  $\mathbf{x} \in [0, 1] \times [0, 1]$ . We use the JAX simulator and IC generator from PDEBench (Takamoto et al., 2022) for CNS equations. The PDE parameters are drawn in logarithmic scale as in Eq. (7). The IC generator for the pressure, density, and velocity channels is also based on the superposition of sinusoidal functions. However, the velocity channels are renormalized so that the IC has a given input Mach number. Secondly, we constrain the density channel to be positive by

$$\mathbf{u}_\rho = \rho_0 (1 + \Delta_\rho \mathbf{u}'_\rho / \max_x(|\mathbf{u}'_\rho(x)|)) \quad (12)$$

where  $\rho_0$  is sampled from  $[0.1, 10]$  and  $\Delta_\rho$  from  $[0.013, 0.26]$ . The pressure channel  $p$  is similarly transformed using  $\Delta_p \in [0.04, 0.8]$ . The offset  $p_0$  is defined relatively to  $\rho_0$  as  $p_0 = T_0 \rho_0$  with  $T_0 \in [0.1, 10]$ . The compressibility is reduced using a Helmholtz-decomposition (Takamoto et al., 2022). A windowing is applied with a probability of 50% to a channel.

## C ADDITIONAL MODEL AND TRAINING DETAILS

This section describes the baseline surrogate models used in more detail, lists the hyperparameters, and explains various training methods. First, we provide a short description of the base models used. Then, we explain the training methods and list the hyperparameters.

### C.1 FOURIER NEURAL OPERATORS (FNOS)

We use the FNO (Li et al., 2020b) implementation provided by PDEBench (Takamoto et al., 2022). FNOS are based on spectral convolutions, where the layer input is transformed using a Fast Fourier Transformation (FFT), multiplied in the Fourier space with a weight matrix, and then transformed back using an inverse FFT. Following the recent observations made in Lanthaler et al. (2023; 2024) that only a small fixed number of modes are sufficient to achieve the needed expressivity of FNO, we retain only a limited number of low-frequency Fourier modes and discard the ones with higher frequencies. The raw PDE parameter values are appended as additional constant channels to the model input (Takamoto et al., 2023).

## 972 C.2 U-SHAPED NETWORKS (U-NETS)

973  
974 U-Net (Ronneberger et al., 2015) is a common architecture in computer vision, particularly for  
975 perception and semantic segmentation tasks. The structure resembles an hourglass, where the inputs  
976 are first successively downsampled at multiple levels and then gradually, with the same number of  
977 levels, upsampled back to the original input resolution. This structure allows the model to capture  
978 and process spatial information at multiple scales and resolutions. The U-Net used in this paper is  
979 based on the modern U-Net version of Gupta & Brandstetter (2023), which differs from the original  
980 U-Net (Ronneberger et al., 2015) by including improvements such as group normalization (Wu & He,  
981 2018). The model is conditioned on the input PDE parameter values, where they are transformed into  
982 vectors using a learnable Fourier embedding (Vaswani et al., 2017) and a projection layer and are  
983 then added to the convolutional layers’ inputs in the *up* and *down* blocks.

## 984 C.3 SINE NET

985  
986 U-Nets were originally designed for semantic segmentation problems in medical images (Ronneberger  
987 et al., 2015). Due to its intrinsic capabilities for multi-scale representation modeling, U-Nets have  
988 been widely adopted by the SciML community for PDE solving (Takamoto et al., 2022; Gupta &  
989 Brandstetter, 2023; Lippe et al., 2023; Rahman et al., 2022; Ovidia et al., 2023). One of the important  
990 components of U-Nets to recover high-resolution details in the upsampling path is by the fusion  
991 of feature maps using skip connections. This does not cause an issue for semantic segmentation  
992 tasks since the desired output for a given image is a segmentation mask. However, in the context of  
993 time-dependent PDE solving, specifically for advection-type PDEs modeling transport phenomena,  
994 this is not well-suited since there will be a “lag” in the feature maps of the downsampling path since  
995 the upsampling path is expected to predict the solution  $\mathbf{u}$  for the next timestep. This detail was  
996 overlooked in U-Net adaptations for time-dependent PDE solving. SineNet is a recently introduced  
997 image-to-image model that aims to mitigate this problem by stacking several U-Nets, called *waves*,  
998 drastically reducing the feature misalignments. More formally, SineNet learns the mapping

$$999 \quad \mathbf{x}_t = P(\{\mathbf{u}_{t-h+1}, \dots, \mathbf{u}_t\})$$

$$1000 \quad \mathbf{u}_{t+1} = Q(\mathbf{x}_{t+1})$$

$$1001 \quad \mathbf{x}_{t+\Delta_k} = V_k(\mathbf{x}_{t-\Delta_{k-1}}), \quad k = 1, \dots, K$$

1002  
1003 Unlike the original SineNet, our adaptation uses only one temporal step as a context to predict the  
1004 solution for the subsequent timestep.

## 1006 C.4 HYPERPARAMETERS AND TRAINING PROTOCOLS

1007  
1008 During AL, we use  $m=1$  for power sampling and a prediction batch size for the pool of 200. The  
1009 features of all inputs are projected using the sketch operator to a dimension of 512. Table 2 lists the  
1010 model hyperparameters.

1011 The inputs are channel-wise normalized using the standard deviation of the different channels on the  
1012 initial data set. The outputs are denormalized accordingly. The input only consists of the current  
1013 state  $\mathbf{u}_t$ , not including data from prior timesteps. All models are used to predict the difference to the  
1014 current timestep (for U-Net, the outputs are multiplied with a fixed factor of 0.3 following Lippe et al.  
1015 (2023)).

1016 We employ one- and two-step training strategies during the training phase and a complete rollout  
1017 of the trajectories during validation. For the FNO model in the 2D experiment we found it better to  
1018 use the teacher-forcing schedule from Takamoto et al. (2023). We found it necessary to add gradient  
1019 clipping to prevent a sudden divergence in the training curve. To account for the very different  
1020 gradient norms among problems, we set the upper limit to 5 times the highest gradient found in the  
1021 first five epochs. Afterwards, the limit is adapted using a moving average.

## 1023 C.5 HARDWARE AND RUNTIME

1024 The experiments were performed on NVIDIA GeForce RTX 4090 GPUs (one per experiment).  
1025 Table 3 shows the runtime and GPU memory during training.

1026  
1027  
1028  
1029  
1030  
1031  
1032  
1033  
1034  
1035  
1036  
1037  
1038  
1039  
1040  
1041  
1042  
1043  
1044  
1045  
1046

| U-Net              |                                 |
|--------------------|---------------------------------|
| Activation         | GELU (Hendrycks & Gimpel, 2016) |
| Conditioning       | Fourier (Vaswani et al., 2017)  |
| Channel multiplier | [1, 2, 2, 4]                    |
| Hidden Channels    | 16                              |
| # Param            | 3,378,865 (1D) / 9,182,036 (2D) |
| FNO                |                                 |
| Activation         | GELU (Hendrycks & Gimpel, 2016) |
| Conditioning       | Additional input channel        |
| Layers             | 4                               |
| Width              | 64 (1D) / 32 (2D)               |
| Modes              | 20                              |
| # Param            | 353,154 (1D) / 3,286,310 (2D)   |
| SineNet            |                                 |
| Activation         | GELU (Hendrycks & Gimpel, 2016) |
| Conditioning       | Fourier (Vaswani et al., 2017)  |
| Hidden Channels    | 32                              |
| Waves              | 4                               |
| # Param            | 5,020,840 (2D)                  |

1047  
1048  
1049  
1050  
1051  
1052  
1053  
1054  
1055  
1056  
1057  
1058  
1059  
1060  
1061

Table 2: Model hyperparameters.

|                       | Burgers | KS   | CE   | CNS  |
|-----------------------|---------|------|------|------|
| Runtime in h          |         |      |      |      |
| Random                | 15.1    | 12.9 | 16.8 | 37.9 |
| SBAL                  | 22.9    | 20.1 | 25.6 | 54.4 |
| LCMD                  | 14.5    | 13.9 | 17.2 | 39.0 |
| Core-Set              | 14.5    | 13.4 | 16.6 | 39.7 |
| Top-K                 | 22.1    | 29.8 | 26.4 | 55.5 |
| Training Memory in GB |         |      |      |      |
| All                   | 8.16    | 8.18 | 4.47 | 7.29 |

1062  
1063  
1064  
1065  
1066  
1067  
1068  
1069

Table 3: Total runtime of the different AL methods and the memory during training (since all methods train the same model, the memory usage during training is identical).

## C.6 TIMING EXPERIMENT

1070  
1071  
1072  
1073  
1074  
1075  
1076  
1077  
1078  
1079

A realistic time measurement for the simulator of Burgers’ equation is challenging. Firstly, we observed that we can reach the shortest time per trajectory by setting the batch size to 4096 (0.52 seconds). Therefore, we use this as the fixed time per trajectory. The actual simulation times per AL iteration are higher since we start with batch sizes below this saturation point. Secondly, the simulation step size is adapted to the PDE parameter value due to the CFL condition (Lewy et al., 1928). Therefore, it would be beneficial to batch similar parameter values together and also to consider the parameter simulation costs in the acquisition function. Fig. 9 shows training, selection, and simulation times.

The FNO surrogate used for selection is only trained for 20 epochs with a batch size of 1024. We use one-step training, and the learning rate of 0.001 is not annealed. The model itself has a width of 20 and uses 20 modes, resulting in 36,706 parameters. During selection, a batch size of 32,768 is used.



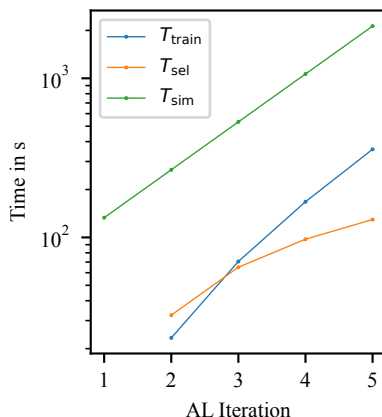

Figure 9: Cumulative training, selection, and simulation times necessary to reach the given active learning iteration (e.g., time to select data for iteration 2 counted in iteration 2) for 1D Burgers PDE.

## D FRAMEWORK OVERVIEW

The framework has three major components: `Model`, `BatchSelection`, and `Task`. `Task` acts as a container of all the PDE-specific information and contains the `Simulator`, `PDEParamGenerator`, and `ICGenerator` classes. `PDEParamGenerator` and `ICGenerator` can draw samples from the test input distribution  $p_T$ . The inputs are first drawn from a normalized range and then transformed into the actual inputs. Afterward, the inputs can be passed to the simulator to be evolved into a trajectory. Listing 1 shows the pseudocode of the (random) data generation pipeline. In order to implement a new PDE, a user has to implement a new subclass of `Simulator` overwrite the `__call__` function and, if desired, add a new `ICGenerator`.

Listing 2 shows the interface for the `Model` and `ProbModel` classes. `Model` provides functions to rollout a surrogate and deals with the training and evaluation. In order to add a new surrogate, a user has to overwrite the `forward` method. The `rollout` function also allows to get the internal model features for distance-based acquisition functions. `ProbModel` is an extension of the `Model` class, which adds the possibility of getting an uncertainty estimate. After training the model, the `BatchSelection` class is called in order to select a new set of inputs. The most important subclass is the `PoolBased` class, which deals with managing the pool and provides the `select_next` method, which a new pool-based method has to overwrite.

```

1134
1135
1136
1137
1138
1139
1140
1141
1142
1143
1144
1145
1146 1 class PDEParamGenerator:
1147 2
1148 3     def get_normed_pde_params(self, n):
1149 4         # Generates the random PDE parameters in a normed space
1150 5         # (e.g. between 0 and 1).
1151 6
1152 7     def get_pde_params(self, pde_params_normed):
1153 8         # Transforms the normed parameters to their true value.
1154 9
1155 10 class ICGenerator:
1156 11
1157 12     def initialize_ic_params(self, n):
1158 13         # Generates the random parameters of an IC (e.g. Mach number).
1159 14
1160 15     def generate_initial_conditions(self, ic_params, pde_params)
1161 16         # Transforms the IC parameters and PDE parameters to the IC.
1162 17
1163 18 class Simulator:
1164 19
1165 20     def __call__(self, ic, pde_params, grid):
1166 21         # Evolves the IC for a given PDE parameter.
1167 22
1168 23     # generate pde parameters
1169 24     pde_params_normed = pde_gen.get_normed_pde_params(n)
1170 25     pde_params = pde_gen.get_pde_params(pde_params_normed)
1171 26
1172 27     # generate ICs
1173 28     ic_params = ic_gen.initialize_ic_params(n)
1174 29     ic_gen.generate_initial_conditions(ic_params, pde_params)
1175 30
1176 31     trajectories = sim(ic, pde_param, grid)
1177
1178
1179
1180
1181
1182
1183
1184
1185
1186
1187

```

Listing 1: Interface and example code for generating inputs and simulation.

```

1188
1189
1190
1191
1192
1193
1194 1 class Model(nn.Module):
1195 2
1196 3     def init_training(self, al_iter):
1197 4         # Reset model, optimizer, scheduler, ...
1198 5
1199 6     def forward(self, xx, grid, param, return_features):
1200 7         # Predict next state.
1201 8
1202 9     def rollout(self, xx, grid, final_step, param, return_features):
1203 10         # Autoregressive rollout of the model until timestep final_step.
1204 11
1205 12     def evaluate(self, step, loader, prefix):
1206 13         # Evaluate the model on the given dataset (e.g. validation, train).
1207 14
1208 15     def train_single_epoch(self, current_epoch, total_epoch, num_epoch):
1209 16         # Train the model for one epoch.
1210 17
1211 18     def train_n_epoch(self, al_iter, num_epoch):
1212 19         # Train the model .
1213 20
1214 21
1215 22 class ProbModel(Model):
1216 23
1217 24     def uncertainty(self, xx, grid, param):
1218 25         # Get uncertainty over next state.
1219 26
1220 27     def unc_roll_out(self, xx, grid, final_step, param, return_features):
1221 28         # Compute prediction and uncertainty of the rollout.
1222 29
1223 30
1224 31 class BatchSelection:
1225 32
1226 33     def generate(self, prob_model, al_iter, train_loader):
1227 34         # Selects new inputs and passes them to the simulator.
1228 35
1229 36
1230 37 class PoolBased(BatchSelection):
1231 38
1232 39     def select_next(self, step, prob_model, ic_pool, pde_param_pool,
1233 40                 ic_train, pde_param_train, grid, al_iter):
1234 41         # Selects new input from (ic_pool, pde_param_pool).
1235 42
1236 43
1237 44 for al_iter in range(num_al_iter):
1238 45     # retrain model
1239 46     prob_model.train_n_epoch(al_iter, num_epoch)
1240 47
1241 48     # select next inputs
1242 49     batch_sel.generate(prob_model, al_iter, train_loader)

```

Listing 2: Interface and example code for the neural operator models and AL methods.

## E DETAILED RESULTS

Tables 4, 5, 6 and 7 list the results from the main experiments. Table 8 shows the Pearson and Spearman coefficient of the average uncertainty per trajectory with the average error per trajectory. Among the PDEs, the Pearson correlation coefficient is the lowest on CE. The Spearman coefficient, which measures the correlation in terms of the ranking, is above 0.73 on average for all experiments.

| Iteration                     | 1                 | 2                                   | 3                                   | 4                                   | 5                                   |
|-------------------------------|-------------------|-------------------------------------|-------------------------------------|-------------------------------------|-------------------------------------|
| RMSE $\times 10^{-2}$         |                   |                                     |                                     |                                     |                                     |
| Random                        | $3.684 \pm 1.203$ | $3.278 \pm 2.107$                   | $1.607 \pm 0.485$                   | $1.062 \pm 0.614$                   | $0.552 \pm 0.133$                   |
| SBAL                          | $3.684 \pm 1.203$ | $1.179 \pm 0.223$                   | $0.586 \pm 0.106$                   | $0.400 \pm 0.075$                   | <b><math>0.259 \pm 0.028</math></b> |
| LCMD                          | $3.684 \pm 1.203$ | <b><math>0.808 \pm 0.053</math></b> | <b><math>0.521 \pm 0.052</math></b> | <b><math>0.394 \pm 0.043</math></b> | $0.269 \pm 0.014$                   |
| Core-Set                      | $3.684 \pm 1.203$ | $1.021 \pm 0.160$                   | $0.659 \pm 0.100$                   | $0.476 \pm 0.134$                   | $0.292 \pm 0.015$                   |
| Top-K                         | $3.684 \pm 1.203$ | $1.494 \pm 0.250$                   | $0.964 \pm 0.258$                   | $0.477 \pm 0.044$                   | $0.360 \pm 0.096$                   |
| 50% Quantile $\times 10^{-2}$ |                   |                                     |                                     |                                     |                                     |
| Random                        | $0.182 \pm 0.015$ | <b><math>0.122 \pm 0.015</math></b> | <b><math>0.083 \pm 0.010</math></b> | <b><math>0.058 \pm 0.005</math></b> | <b><math>0.044 \pm 0.007</math></b> |
| SBAL                          | $0.182 \pm 0.015$ | $0.178 \pm 0.032$                   | $0.105 \pm 0.011$                   | $0.078 \pm 0.011$                   | $0.054 \pm 0.006$                   |
| LCMD                          | $0.182 \pm 0.015$ | $0.129 \pm 0.014$                   | $0.101 \pm 0.015$                   | $0.068 \pm 0.008$                   | $0.050 \pm 0.006$                   |
| Core-Set                      | $0.182 \pm 0.015$ | $0.169 \pm 0.017$                   | $0.133 \pm 0.013$                   | $0.094 \pm 0.014$                   | $0.063 \pm 0.008$                   |
| Top-K                         | $0.182 \pm 0.015$ | $0.197 \pm 0.020$                   | $0.176 \pm 0.024$                   | $0.109 \pm 0.010$                   | $0.078 \pm 0.012$                   |
| 95% Quantile $\times 10^{-2}$ |                   |                                     |                                     |                                     |                                     |
| Random                        | $1.468 \pm 0.136$ | $0.834 \pm 0.125$                   | <b><math>0.502 \pm 0.037</math></b> | <b><math>0.343 \pm 0.014</math></b> | <b><math>0.255 \pm 0.025</math></b> |
| SBAL                          | $1.468 \pm 0.136$ | $1.054 \pm 0.248$                   | $0.544 \pm 0.065$                   | $0.409 \pm 0.064$                   | $0.269 \pm 0.026$                   |
| LCMD                          | $1.468 \pm 0.136$ | <b><math>0.669 \pm 0.069</math></b> | $0.503 \pm 0.091$                   | $0.347 \pm 0.030$                   | $0.259 \pm 0.020$                   |
| Core-Set                      | $1.468 \pm 0.136$ | $0.865 \pm 0.123$                   | $0.662 \pm 0.090$                   | $0.503 \pm 0.113$                   | $0.336 \pm 0.034$                   |
| Top-K                         | $1.468 \pm 0.136$ | $1.273 \pm 0.177$                   | $1.045 \pm 0.200$                   | $0.575 \pm 0.064$                   | $0.449 \pm 0.077$                   |
| 99% Quantile $\times 10^{-2}$ |                   |                                     |                                     |                                     |                                     |
| Random                        | $6.315 \pm 0.838$ | $3.327 \pm 0.724$                   | $1.653 \pm 0.111$                   | $0.968 \pm 0.046$                   | $0.649 \pm 0.027$                   |
| SBAL                          | $6.315 \pm 0.838$ | $3.169 \pm 0.945$                   | $1.360 \pm 0.213$                   | $0.987 \pm 0.239$                   | $0.599 \pm 0.056$                   |
| LCMD                          | $6.315 \pm 0.838$ | <b><math>1.802 \pm 0.157</math></b> | <b><math>1.223 \pm 0.237</math></b> | <b><math>0.819 \pm 0.108</math></b> | <b><math>0.573 \pm 0.041</math></b> |
| Core-Set                      | $6.315 \pm 0.838$ | $2.461 \pm 0.500$                   | $1.756 \pm 0.360$                   | $1.153 \pm 0.295$                   | $0.703 \pm 0.056$                   |
| Top-K                         | $6.315 \pm 0.838$ | $4.456 \pm 1.685$                   | $3.251 \pm 1.039$                   | $1.347 \pm 0.129$                   | $1.048 \pm 0.326$                   |

Table 4: Error metrics on Burgers' equation.

1296  
1297  
1298  
1299  
1300  
1301  
1302  
1303  
1304  
1305  
1306  
1307  
1308  
1309  
1310  
1311  
1312  
1313  
1314  
1315  
1316  
1317  
1318  
1319  
1320  
1321  
1322  
1323  
1324  
1325  
1326  
1327  
1328  
1329  
1330  
1331  
1332  
1333  
1334  
1335  
1336  
1337  
1338  
1339  
1340  
1341  
1342  
1343  
1344  
1345  
1346  
1347  
1348  
1349

| Iteration    | 1                 | 2                                   | 3                                   | 4                                   | 5                                   |
|--------------|-------------------|-------------------------------------|-------------------------------------|-------------------------------------|-------------------------------------|
| RMSE         |                   |                                     |                                     |                                     |                                     |
| Random       | $0.452 \pm 0.026$ | $0.370 \pm 0.012$                   | $0.312 \pm 0.013$                   | $0.272 \pm 0.010$                   | $0.229 \pm 0.010$                   |
| SBAL         | $0.452 \pm 0.026$ | <b><math>0.347 \pm 0.020</math></b> | <b><math>0.281 \pm 0.010</math></b> | <b><math>0.236 \pm 0.008</math></b> | <b><math>0.200 \pm 0.012</math></b> |
| LCMD         | $0.452 \pm 0.026$ | $0.370 \pm 0.009$                   | $0.315 \pm 0.013$                   | $0.266 \pm 0.019$                   | $0.219 \pm 0.018$                   |
| Core-Set     | $0.452 \pm 0.026$ | $0.389 \pm 0.011$                   | $0.335 \pm 0.013$                   | $0.278 \pm 0.006$                   | $0.235 \pm 0.020$                   |
| Top-K        | $0.452 \pm 0.026$ | $0.378 \pm 0.018$                   | $0.305 \pm 0.011$                   | $0.264 \pm 0.014$                   | $0.225 \pm 0.015$                   |
| 50% Quantile |                   |                                     |                                     |                                     |                                     |
| Random       | $0.021 \pm 0.005$ | <b><math>0.011 \pm 0.002</math></b> | <b><math>0.008 \pm 0.001</math></b> | <b><math>0.005 \pm 0.001</math></b> | <b><math>0.003 \pm 0.001</math></b> |
| SBAL         | $0.021 \pm 0.005$ | $0.016 \pm 0.004$                   | $0.013 \pm 0.003$                   | $0.008 \pm 0.001$                   | $0.006 \pm 0.001$                   |
| LCMD         | $0.021 \pm 0.005$ | $0.020 \pm 0.003$                   | $0.016 \pm 0.003$                   | $0.009 \pm 0.003$                   | $0.006 \pm 0.001$                   |
| Core-Set     | $0.021 \pm 0.005$ | $0.022 \pm 0.003$                   | $0.021 \pm 0.002$                   | $0.014 \pm 0.002$                   | $0.009 \pm 0.002$                   |
| Top-K        | $0.021 \pm 0.005$ | $0.020 \pm 0.003$                   | $0.018 \pm 0.002$                   | $0.012 \pm 0.003$                   | $0.010 \pm 0.002$                   |
| 95% Quantile |                   |                                     |                                     |                                     |                                     |
| Random       | $0.603 \pm 0.106$ | <b><math>0.363 \pm 0.020</math></b> | <b><math>0.231 \pm 0.024</math></b> | <b><math>0.143 \pm 0.011</math></b> | <b><math>0.094 \pm 0.006</math></b> |
| SBAL         | $0.603 \pm 0.106$ | $0.376 \pm 0.060$                   | $0.255 \pm 0.031$                   | $0.163 \pm 0.022$                   | $0.119 \pm 0.018$                   |
| LCMD         | $0.603 \pm 0.106$ | $0.458 \pm 0.024$                   | $0.344 \pm 0.024$                   | $0.230 \pm 0.035$                   | $0.140 \pm 0.023$                   |
| Core-Set     | $0.603 \pm 0.106$ | $0.501 \pm 0.025$                   | $0.425 \pm 0.034$                   | $0.295 \pm 0.021$                   | $0.213 \pm 0.053$                   |
| Top-K        | $0.603 \pm 0.106$ | $0.458 \pm 0.017$                   | $0.340 \pm 0.026$                   | $0.257 \pm 0.039$                   | $0.188 \pm 0.016$                   |
| 99% Quantile |                   |                                     |                                     |                                     |                                     |
| Random       | $2.368 \pm 0.153$ | $1.844 \pm 0.105$                   | $1.382 \pm 0.117$                   | $1.040 \pm 0.092$                   | $0.708 \pm 0.048$                   |
| SBAL         | $2.368 \pm 0.153$ | <b><math>1.655 \pm 0.137</math></b> | <b><math>1.177 \pm 0.100</math></b> | <b><math>0.844 \pm 0.103</math></b> | <b><math>0.619 \pm 0.093</math></b> |
| LCMD         | $2.368 \pm 0.153$ | $1.811 \pm 0.056$                   | $1.440 \pm 0.097$                   | $1.151 \pm 0.123$                   | $0.802 \pm 0.149$                   |
| Core-Set     | $2.368 \pm 0.153$ | $1.920 \pm 0.077$                   | $1.571 \pm 0.090$                   | $1.230 \pm 0.046$                   | $0.982 \pm 0.202$                   |
| Top-K        | $2.368 \pm 0.153$ | $1.860 \pm 0.126$                   | $1.356 \pm 0.092$                   | $1.138 \pm 0.086$                   | $0.873 \pm 0.119$                   |

Table 5: Error metrics on KS.

1350  
 1351  
 1352  
 1353  
 1354  
 1355  
 1356  
 1357  
 1358  
 1359  
 1360  
 1361  
 1362  
 1363  
 1364  
 1365  
 1366  
 1367  
 1368  
 1369  
 1370  
 1371  
 1372  
 1373  
 1374  
 1375  
 1376  
 1377  
 1378  
 1379  
 1380  
 1381  
 1382  
 1383  
 1384  
 1385  
 1386  
 1387  
 1388  
 1389  
 1390  
 1391  
 1392  
 1393  
 1394  
 1395  
 1396  
 1397  
 1398  
 1399  
 1400  
 1401  
 1402  
 1403

| Iteration                     | 1                  | 2                                   | 3                                   | 4                                   | 5                                   |
|-------------------------------|--------------------|-------------------------------------|-------------------------------------|-------------------------------------|-------------------------------------|
| RMSE $\times 10^{-2}$         |                    |                                     |                                     |                                     |                                     |
| Random                        | 4.651 $\pm$ 1.293  | 3.814 $\pm$ 1.121                   | 2.609 $\pm$ 0.466                   | 1.630 $\pm$ 0.257                   | 1.108 $\pm$ 0.117                   |
| SBAL                          | 4.651 $\pm$ 1.293  | 1.597 $\pm$ 0.083                   | 0.931 $\pm$ 0.125                   | <b>0.496 <math>\pm</math> 0.087</b> | <b>0.318 <math>\pm</math> 0.048</b> |
| LCMD                          | 4.651 $\pm$ 1.293  | <b>1.528 <math>\pm</math> 0.121</b> | 0.957 $\pm$ 0.114                   | 0.609 $\pm$ 0.107                   | 0.338 $\pm$ 0.041                   |
| Core-Set                      | 4.651 $\pm$ 1.293  | 1.596 $\pm$ 0.235                   | 1.033 $\pm$ 0.076                   | 0.761 $\pm$ 0.230                   | 0.424 $\pm$ 0.053                   |
| Top-K                         | 4.651 $\pm$ 1.293  | 1.678 $\pm$ 0.099                   | <b>0.904 <math>\pm</math> 0.101</b> | 0.529 $\pm$ 0.103                   | 0.373 $\pm$ 0.077                   |
| 50% Quantile $\times 10^{-2}$ |                    |                                     |                                     |                                     |                                     |
| Random                        | 0.238 $\pm$ 0.025  | <b>0.166 <math>\pm</math> 0.036</b> | <b>0.125 <math>\pm</math> 0.021</b> | 0.083 $\pm$ 0.005                   | 0.065 $\pm$ 0.004                   |
| SBAL                          | 0.238 $\pm$ 0.025  | 0.200 $\pm$ 0.024                   | 0.125 $\pm$ 0.009                   | <b>0.076 <math>\pm</math> 0.008</b> | <b>0.052 <math>\pm</math> 0.004</b> |
| LCMD                          | 0.238 $\pm$ 0.025  | 0.171 $\pm$ 0.007                   | 0.128 $\pm$ 0.015                   | 0.083 $\pm$ 0.008                   | 0.054 $\pm$ 0.004                   |
| Core-Set                      | 0.238 $\pm$ 0.025  | 0.224 $\pm$ 0.070                   | 0.168 $\pm$ 0.020                   | 0.143 $\pm$ 0.059                   | 0.083 $\pm$ 0.009                   |
| Top-K                         | 0.238 $\pm$ 0.025  | 0.211 $\pm$ 0.019                   | 0.155 $\pm$ 0.016                   | 0.111 $\pm$ 0.015                   | 0.073 $\pm$ 0.008                   |
| 95% Quantile $\times 10^{-2}$ |                    |                                     |                                     |                                     |                                     |
| Random                        | 2.373 $\pm$ 0.220  | 1.619 $\pm$ 0.222                   | 1.090 $\pm$ 0.050                   | 0.695 $\pm$ 0.039                   | 0.516 $\pm$ 0.019                   |
| SBAL                          | 2.373 $\pm$ 0.220  | 1.723 $\pm$ 0.126                   | <b>0.980 <math>\pm</math> 0.070</b> | <b>0.510 <math>\pm</math> 0.036</b> | <b>0.313 <math>\pm</math> 0.014</b> |
| LCMD                          | 2.373 $\pm$ 0.220  | <b>1.485 <math>\pm</math> 0.121</b> | 1.038 $\pm$ 0.087                   | 0.609 $\pm$ 0.061                   | 0.361 $\pm$ 0.020                   |
| Core-Set                      | 2.373 $\pm$ 0.220  | 1.902 $\pm$ 0.379                   | 1.389 $\pm$ 0.126                   | 1.102 $\pm$ 0.469                   | 0.598 $\pm$ 0.095                   |
| Top-K                         | 2.373 $\pm$ 0.220  | 1.901 $\pm$ 0.100                   | 1.236 $\pm$ 0.099                   | 0.739 $\pm$ 0.151                   | 0.416 $\pm$ 0.039                   |
| 99% Quantile $\times 10^{-2}$ |                    |                                     |                                     |                                     |                                     |
| Random                        | 10.192 $\pm$ 1.523 | 7.260 $\pm$ 1.226                   | 4.741 $\pm$ 0.281                   | 2.893 $\pm$ 0.227                   | 1.870 $\pm$ 0.099                   |
| SBAL                          | 10.192 $\pm$ 1.523 | 4.756 $\pm$ 0.215                   | <b>2.701 <math>\pm</math> 0.251</b> | <b>1.433 <math>\pm</math> 0.070</b> | <b>0.896 <math>\pm</math> 0.053</b> |
| LCMD                          | 10.192 $\pm$ 1.523 | <b>4.198 <math>\pm</math> 0.103</b> | 2.787 $\pm$ 0.210                   | 1.631 $\pm$ 0.178                   | 0.991 $\pm$ 0.038                   |
| Core-Set                      | 10.192 $\pm$ 1.523 | 5.056 $\pm$ 0.827                   | 3.526 $\pm$ 0.212                   | 2.638 $\pm$ 1.069                   | 1.446 $\pm$ 0.290                   |
| Top-K                         | 10.192 $\pm$ 1.523 | 5.382 $\pm$ 0.373                   | 3.174 $\pm$ 0.181                   | 1.756 $\pm$ 0.448                   | 0.972 $\pm$ 0.092                   |

Table 6: Error metrics on CE.



1404  
1405  
1406  
1407  
1408  
1409  
1410  
1411  
1412  
1413  
1414  
1415  
1416  
1417  
1418  
1419  
1420  
1421  
1422  
1423  
1424  
1425  
1426  
1427  
1428  
1429  
1430  
1431  
1432  
1433  
1434  
1435  
1436  
1437  
1438  
1439  
1440  
1441  
1442  
1443  
1444  
1445  
1446  
1447  
1448  
1449  
1450  
1451  
1452  
1453  
1454  
1455  
1456  
1457

| Iteration    | 1              | 2                    | 3                    | 4                    | 5                    |
|--------------|----------------|----------------------|----------------------|----------------------|----------------------|
| RMSE         |                |                      |                      |                      |                      |
| Random       | 2.662 ± 0.339  | 2.162 ± 0.029        | 1.856 ± 0.106        | 1.572 ± 0.072        | 1.362 ± 0.065        |
| SBAL         | 2.662 ± 0.339  | <b>1.979 ± 0.226</b> | 1.790 ± 0.203        | 1.458 ± 0.140        | <b>1.205 ± 0.027</b> |
| LCMD         | 2.662 ± 0.339  | 1.991 ± 0.293        | 1.734 ± 0.189        | <b>1.356 ± 0.081</b> | 1.277 ± 0.083        |
| Core-Set     | 2.662 ± 0.339  | 2.322 ± 0.350        | <b>1.731 ± 0.168</b> | 1.613 ± 0.202        | 1.343 ± 0.186        |
| Top-K        | 2.662 ± 0.339  | 2.684 ± 1.129        | 2.070 ± 0.368        | 1.623 ± 0.524        | 1.313 ± 0.106        |
| 50% Quantile |                |                      |                      |                      |                      |
| Random       | 0.506 ± 0.119  | <b>0.447 ± 0.156</b> | <b>0.356 ± 0.111</b> | <b>0.266 ± 0.087</b> | <b>0.209 ± 0.034</b> |
| SBAL         | 0.506 ± 0.119  | 0.480 ± 0.116        | 0.543 ± 0.344        | 0.336 ± 0.063        | 0.295 ± 0.053        |
| LCMD         | 0.506 ± 0.119  | 0.574 ± 0.361        | 0.412 ± 0.234        | 0.317 ± 0.065        | 0.312 ± 0.085        |
| Core-Set     | 0.506 ± 0.119  | 0.562 ± 0.154        | 0.411 ± 0.085        | 0.433 ± 0.191        | 0.408 ± 0.120        |
| Top-K        | 0.506 ± 0.119  | 0.653 ± 0.165        | 0.521 ± 0.133        | 0.483 ± 0.174        | 0.400 ± 0.065        |
| 95% Quantile |                |                      |                      |                      |                      |
| Random       | 4.421 ± 0.630  | 3.491 ± 0.154        | 2.828 ± 0.314        | 2.317 ± 0.207        | 1.927 ± 0.170        |
| SBAL         | 4.421 ± 0.630  | 3.308 ± 0.550        | 2.936 ± 0.370        | 2.310 ± 0.349        | <b>1.821 ± 0.128</b> |
| LCMD         | 4.421 ± 0.630  | <b>3.263 ± 0.561</b> | <b>2.758 ± 0.351</b> | <b>2.025 ± 0.177</b> | 2.003 ± 0.326        |
| Core-Set     | 4.421 ± 0.630  | 4.235 ± 0.899        | 2.952 ± 0.375        | 2.690 ± 0.396        | 2.189 ± 0.437        |
| Top-K        | 4.421 ± 0.630  | 5.009 ± 2.402        | 3.891 ± 0.921        | 2.911 ± 1.392        | 2.238 ± 0.289        |
| 99% Quantile |                |                      |                      |                      |                      |
| Random       | 11.378 ± 1.863 | 9.135 ± 0.253        | 7.754 ± 0.507        | 6.620 ± 0.340        | 5.735 ± 0.320        |
| SBAL         | 11.378 ± 1.863 | 8.295 ± 1.062        | <b>7.195 ± 0.786</b> | 6.058 ± 0.573        | <b>4.933 ± 0.112</b> |
| LCMD         | 11.378 ± 1.863 | <b>8.196 ± 0.926</b> | 7.229 ± 0.609        | <b>5.569 ± 0.362</b> | 5.265 ± 0.399        |
| Core-Set     | 11.378 ± 1.863 | 9.739 ± 1.416        | 7.263 ± 0.707        | 6.646 ± 0.794        | 5.404 ± 0.722        |
| Top-K        | 11.378 ± 1.863 | 11.424 ± 5.585       | 8.531 ± 1.478        | 6.466 ± 2.101        | 5.237 ± 0.417        |

Table 7: Error metrics on CNS.

| Iteration       | 1           | 2           | 3           | 4           |
|-----------------|-------------|-------------|-------------|-------------|
| Pearson         |             |             |             |             |
| KS              | 87.1 ± 3.8  | 84.9 ± 2.3  | 78.0 ± 5.4  | 80.5 ± 3.7  |
| CE              | 49.2 ± 16.2 | 62.0 ± 14.6 | 41.3 ± 22.1 | 73.8 ± 20.9 |
| CNS             | 78.2 ± 6.4  | 78.9 ± 18.0 | 90.8 ± 2.7  | 94.3 ± 2.0  |
| Burgers $M = 2$ | 92.0 ± 6.3  | 71.3 ± 27.1 | 71.4 ± 11.5 | 67.9 ± 18.4 |
| Burgers $M = 6$ | 89.5 ± 8.2  | 60.9 ± 26.7 | 67.9 ± 19.6 |             |
| Spearman        |             |             |             |             |
| KS              | 86.4 ± 2.8  | 83.0 ± 2.8  | 83.9 ± 4.2  | 82.7 ± 0.4  |
| CE              | 87.4 ± 1.7  | 83.9 ± 2.1  | 81.2 ± 1.0  | 80.5 ± 1.5  |
| CNS             | 94.6 ± 2.4  | 93.4 ± 2.3  | 91.1 ± 3.9  | 93.4 ± 1.6  |
| Burgers $M = 2$ | 87.5 ± 2.7  | 83.2 ± 11.0 | 75.2 ± 5.0  | 73.7 ± 5.3  |
| Burgers $M = 6$ | 90.3 ± 0.9  | 84.5 ± 2.3  | 80.8 ± 2.2  |             |

Table 8: Correlation coefficients in percent between the error and the uncertainty averages per trajectory, including the standard deviation. Computed for SBAL on the main experiments as well as the ensemble size ablation experiment.

## 1458 F OVERVIEW OF THE GENERATED DATASETS

1459

1460 In the following sections, we show visual examples of the data selected by random sampling and  
 1461 SBAL, and the marginal distributions of all PDE and IC parameters afterwards.  
 1462

1463

### 1464 F.1 EXAMPLE TRAJECTORIES

1465

1466

1467

1468

1469

1470

1471

1472

1473

1474

1475

1476

1477

1478

1479

1480

1481

1482

1483

1484

1485

1486

1487

1488

1489

1490

1491

1492

1493

1494

1495

1496

1497

1498

1499

1500

1501

1502

1503

1504

1505

1506

1507

1508

1509

1510

1511

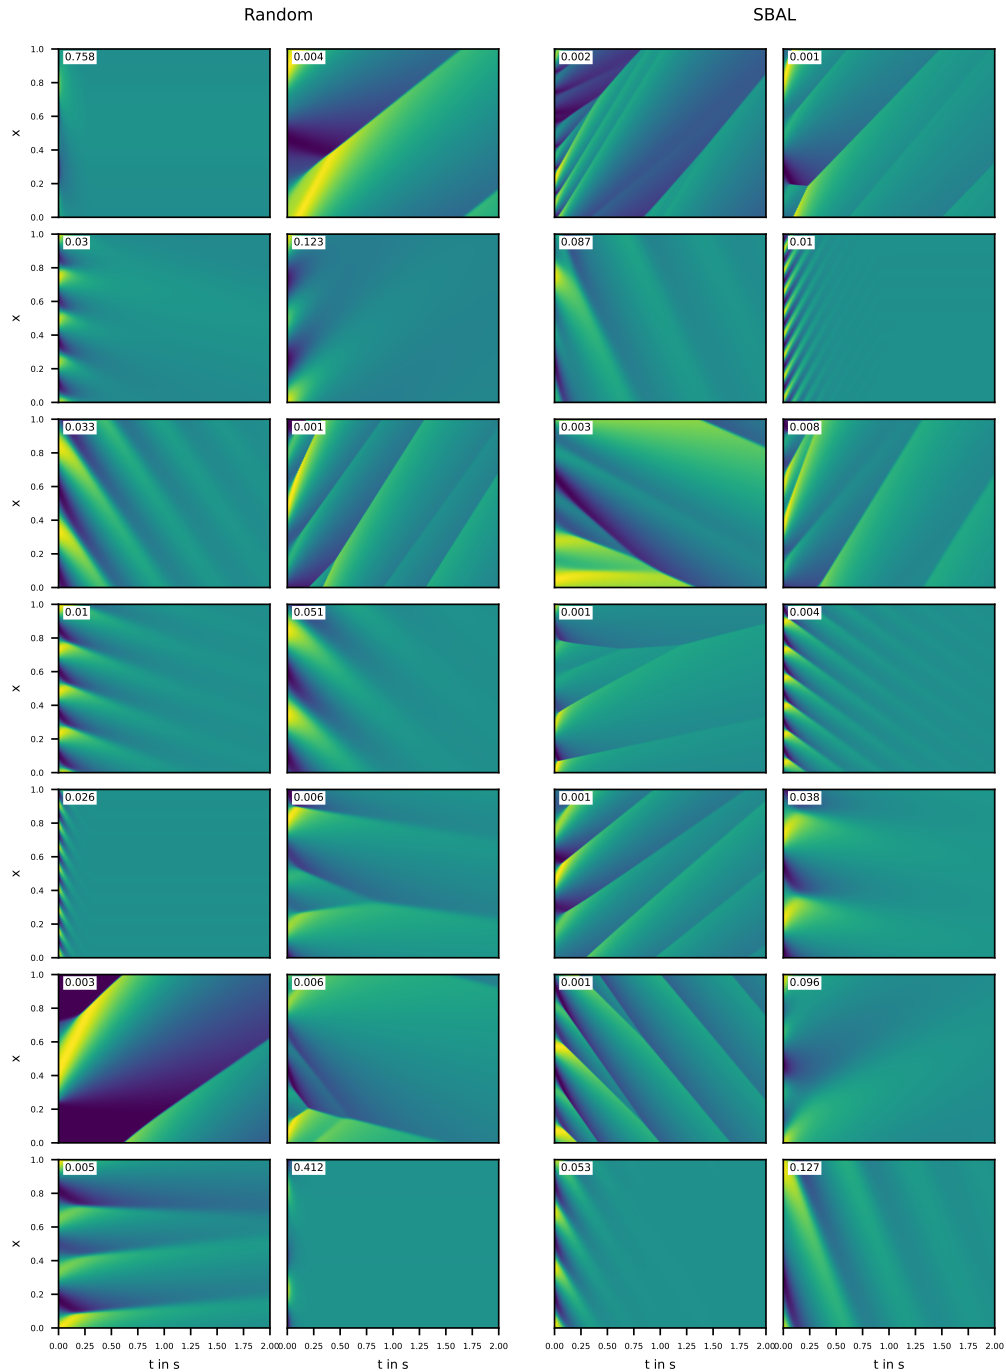

Figure 10: Example ground truth trajectories of random and SBAL on Burgers. The number on the top left of the trajectories shows the PDE parameter  $\nu$ .

1512  
 1513  
 1514  
 1515  
 1516  
 1517  
 1518  
 1519  
 1520  
 1521  
 1522  
 1523  
 1524  
 1525  
 1526  
 1527  
 1528  
 1529  
 1530  
 1531  
 1532  
 1533  
 1534  
 1535  
 1536  
 1537  
 1538  
 1539  
 1540  
 1541  
 1542  
 1543  
 1544  
 1545  
 1546  
 1547  
 1548  
 1549  
 1550  
 1551  
 1552  
 1553  
 1554  
 1555  
 1556  
 1557  
 1558  
 1559  
 1560  
 1561  
 1562  
 1563  
 1564  
 1565

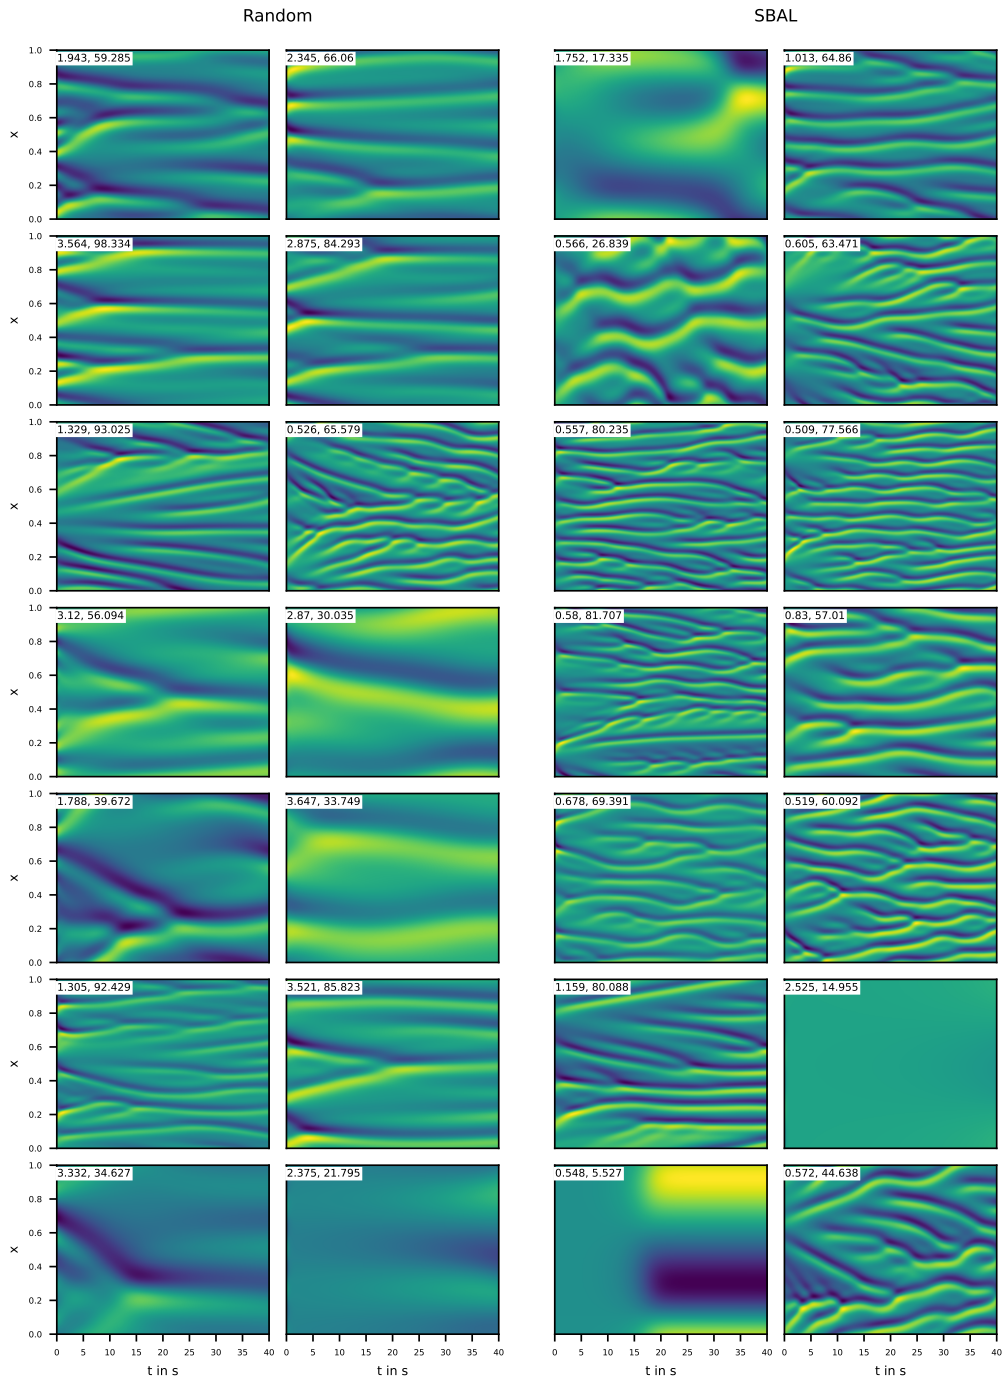

Figure 11: Example ground truth trajectories of random and SBAL on **KS**. The number on the top left of the trajectories shows the parameters ( $\nu, L$ ). The x-axis is shown in normalized values between 0 and 1 independent of the variable domain length  $L$ .

1566  
 1567  
 1568  
 1569  
 1570  
 1571  
 1572  
 1573  
 1574  
 1575  
 1576  
 1577  
 1578  
 1579  
 1580  
 1581  
 1582  
 1583  
 1584  
 1585  
 1586  
 1587  
 1588  
 1589  
 1590  
 1591  
 1592  
 1593  
 1594  
 1595  
 1596  
 1597  
 1598  
 1599  
 1600  
 1601  
 1602  
 1603  
 1604  
 1605  
 1606  
 1607  
 1608  
 1609  
 1610  
 1611  
 1612  
 1613  
 1614  
 1615  
 1616  
 1617  
 1618  
 1619

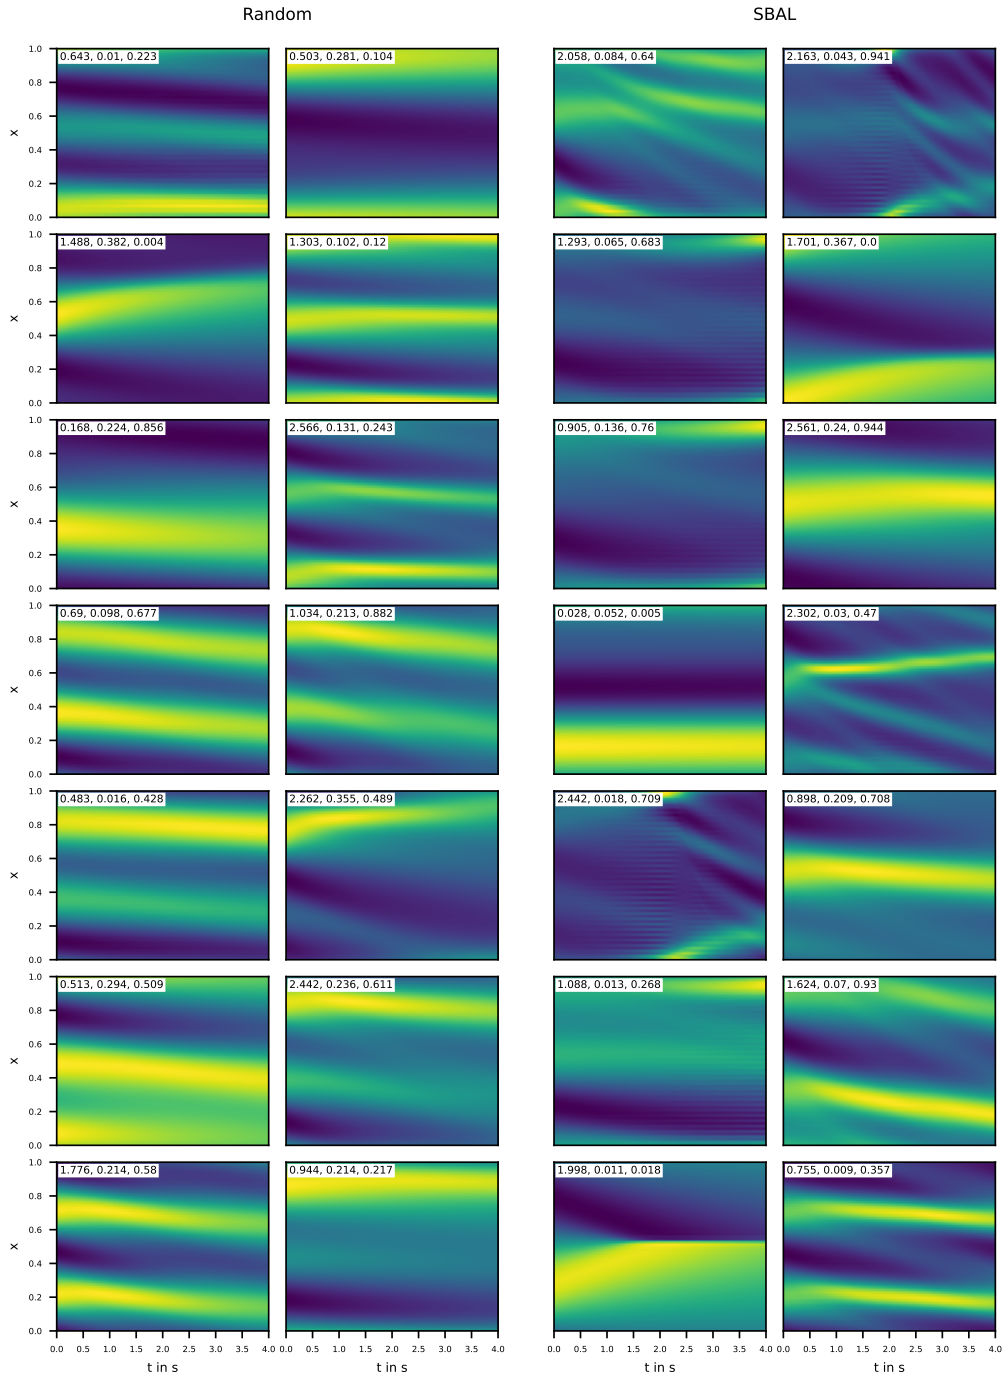

Figure 12: Example ground truth trajectories of random and SBAL on CE. The numbers on the top left of the trajectories shows the PDE parameters ( $\alpha$ ,  $\beta$ ,  $\gamma$ ).

1620  
1621  
1622  
1623  
1624  
1625  
1626  
1627  
1628  
1629  
1630  
1631  
1632  
1633  
1634  
1635  
1636  
1637  
1638  
1639  
1640  
1641  
1642  
1643  
1644  
1645  
1646  
1647  
1648  
1649  
1650  
1651  
1652  
1653  
1654  
1655  
1656  
1657  
1658  
1659  
1660  
1661  
1662  
1663  
1664  
1665  
1666  
1667  
1668  
1669  
1670  
1671  
1672  
1673

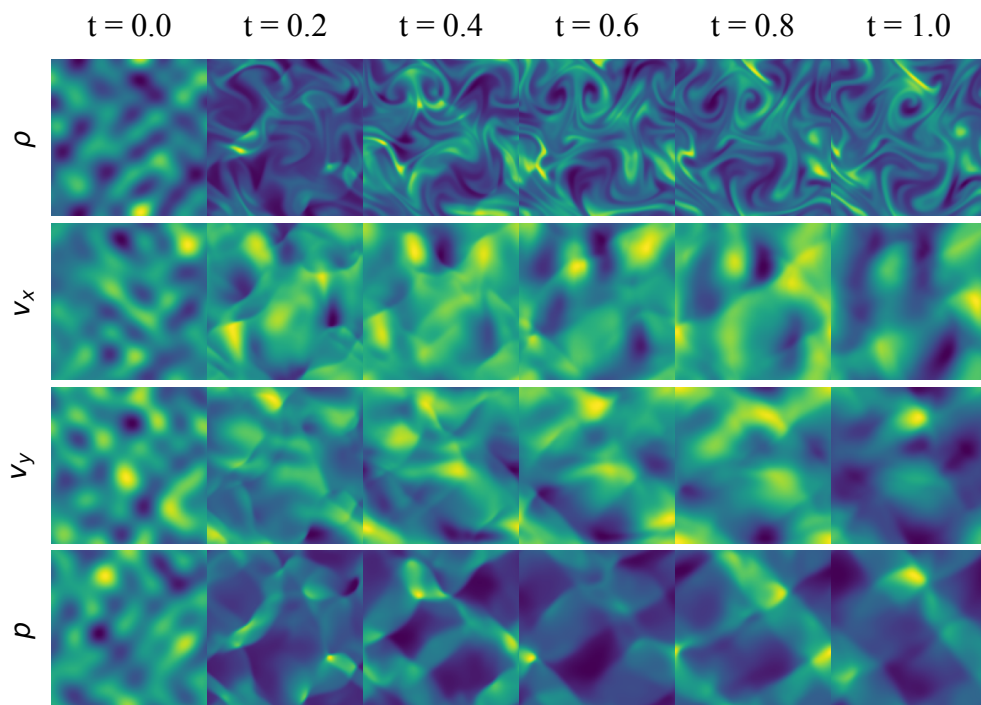

Figure 13: Example ground truth trajectory of CNS.

## F.2 IC PARAMETER MARGINAL DISTRIBUTIONS

Figures 14, 15, 16 and 17 show the marginal distributions of the random parameters of the IC generators, i.e. the random variables drawn which are then transformed using a deterministic function to the actual IC. For example, the KS IC generator draws amplitudes and phases from a uniform distribution and uses them afterward for the superposition of sine waves. If multiple numbers are drawn from each type of variable, we put them together, e.g., in the case of KS, multiple amplitudes are drawn for the different waves, but Fig. 15 only shows the distribution of all amplitude variables mixed. The distribution curves for continuous variables are computed using kernel density estimation. The shaded areas (vertical lines for discrete variables) show the standard deviation between the marginal distributions of different random seeds.

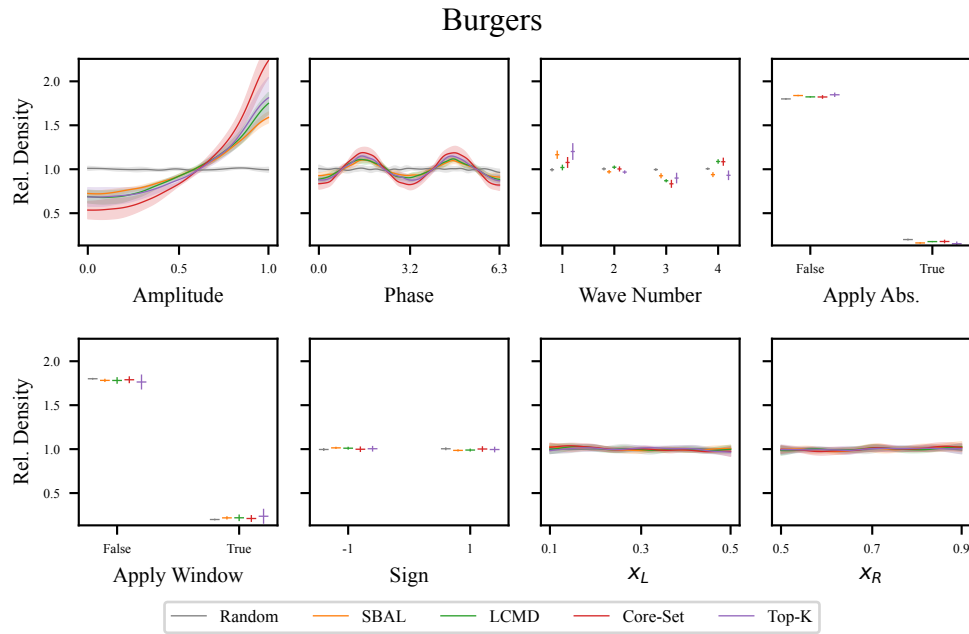

Figure 14: Marginal distribution of the parameters of the ICs sampled by the AL methods for Burgers. Displayed as the ratio to the density of the uniform distribution.

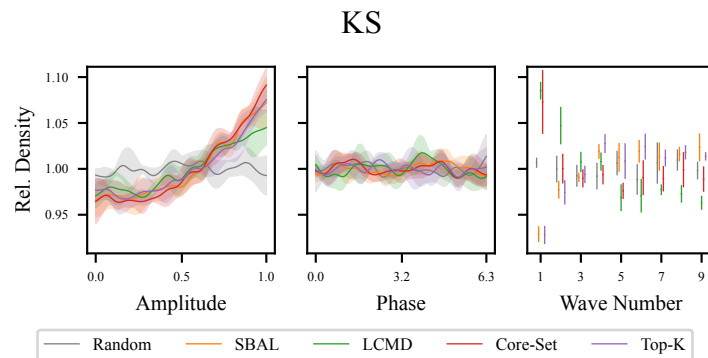

Figure 15: Marginal distribution of the parameters of the ICs sampled by the AL methods for KS. Displayed as the ratio to the density of the uniform distribution.



1728  
 1729  
 1730  
 1731  
 1732  
 1733  
 1734  
 1735  
 1736  
 1737  
 1738  
 1739  
 1740  
 1741  
 1742  
 1743  
 1744  
 1745  
 1746  
 1747  
 1748  
 1749  
 1750  
 1751  
 1752  
 1753  
 1754  
 1755  
 1756  
 1757  
 1758  
 1759  
 1760  
 1761  
 1762  
 1763  
 1764  
 1765  
 1766  
 1767  
 1768  
 1769  
 1770  
 1771  
 1772  
 1773  
 1774  
 1775  
 1776  
 1777  
 1778  
 1779  
 1780  
 1781

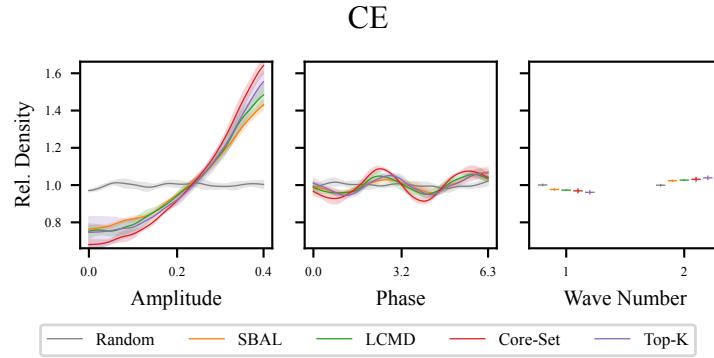

Figure 16: Marginal distribution of the parameters of the ICs sampled by the AL methods for CE. Displayed as the ratio to the density of the uniform distribution.

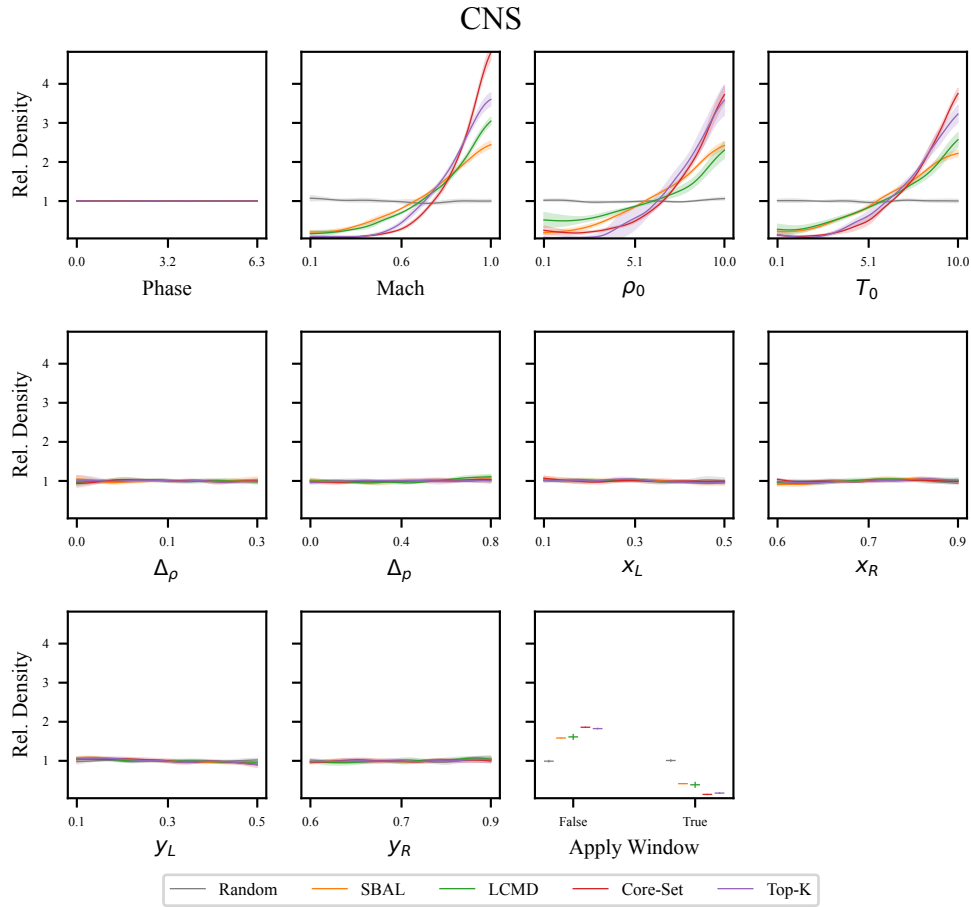

Figure 17: Marginal distribution of the parameters of the ICs sampled by the AL methods for 2D CNS. Displayed as the ratio to the density of the uniform distribution.

### F.3 PDE PARAMETER MARGINAL DISTRIBUTIONS

Similarly Fig. 18 shows the KDE estimates of the dataset after the final AL iteration for the PDE parameters.

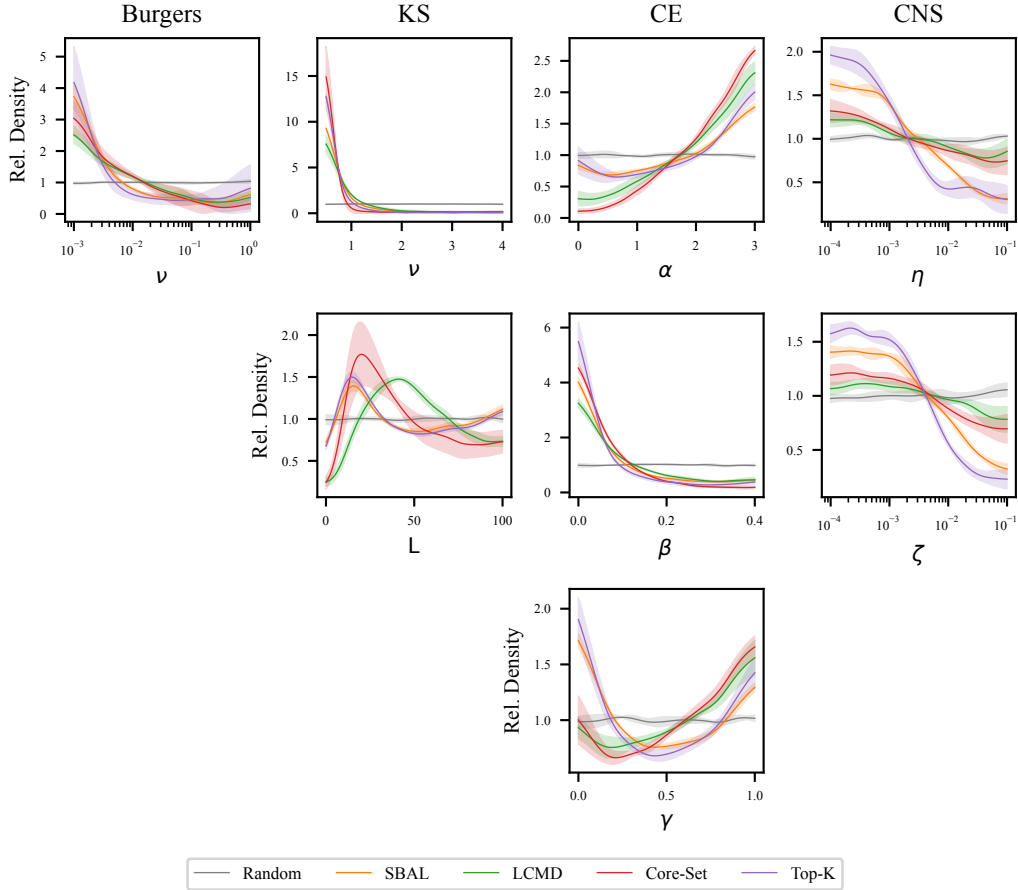

Figure 18: Marginal distribution of the PDE parameters, including the standard deviation between different runs. Displayed as the ratio to the density of the test distribution.
